# Supplementary material
Source: MDPI journal article supplement (https://www.mdpi.com/search?q=molecules-21-00571)
Supplement: s001 [file molecules-21-00571-s001.pdf]

# Supplementary Materials: Two New Cinnamyl Isovalerate Derivatives from *Sabina gausсенii*

Zhang-Hua Sun, Ning-Hua Tan, Guang-Zhi Zeng and Yu-Mei Zhang

## 1. Contents:

- Figure S1**  $^1\text{H-NMR}$  spectrum of 3',4',5'-trimethoxycinnamyl caproate (**1**) in  $\text{CDCl}_3$ .
- Figure S2**  $^{13}\text{C-NMR}$  and DEPT spectra of 3,4,5-trimethoxycinnamyl caproate (**1**) in  $\text{CDCl}_3$ .
- Figure S3** HSQC spectrum of 3,4,5-trimethoxycinnamyl caproate (**1**) in  $\text{CDCl}_3$ .
- Figure S4**  $^1\text{H-}^1\text{H COSY}$  spectrum of 3,4,5-trimethoxycinnamyl caproate (**1**) in  $\text{CDCl}_3$ .
- Figure S5** HMBC spectrum of 3,4,5-trimethoxycinnamyl caproate (**1**) in  $\text{CDCl}_3$ .
- Figure S6** HR-ESI-MS spectrum of 3',4',5'-trimethoxycinnamyl caproate (**1**) in  $\text{CDCl}_3$ .
- Figure S7**  $^1\text{H-NMR}$  spectrum of 3,4,5-trimethoxycinnamyl-4''-methyl-caproate (**2**) in  $\text{CDCl}_3$ .
- Figure S8**  $^{13}\text{C-NMR}$  and DEPT spectra of 3,4,5-trimethoxycinnamyl-4''-methyl-caproate (**2**) in  $\text{CDCl}_3$ .
- Figure S9** HSQC spectrum of 3,4,5-trimethoxycinnamyl-4''-methyl-caproate (**2**) in  $\text{CDCl}_3$ .
- Figure S10**  $^1\text{H-}^1\text{H COSY}$  spectrum of 3,4,5-trimethoxycinnamyl-4''-methyl-caproate (**2**) in  $\text{CDCl}_3$ .
- Figure S11** HMBC spectrum of 3,4,5-trimethoxycinnamyl-4''-methyl-caproate (**2**) in  $\text{CDCl}_3$ .
- Figure S12** HR-ESI-MS spectrum of 3,4,5-trimethoxycinnamyl-4''-methyl-caproate (**2**) in  $\text{CDCl}_3$ .
- Figure S13**  $^1\text{H-NMR}$  spectrum of 3,4,5-dimethoxycinnamyl isovalerate (**3**) in  $\text{CDCl}_3$ .
- Figure S14**  $^{13}\text{C-NMR}$  spectrum of 3,4,5-dimethoxycinnamyl isovalerate (**3**) in  $\text{CDCl}_3$ .
- Figure S15**  $^1\text{H-NMR}$  spectrum of 3,4,5-dimethoxycinnamyl alcohol (**4**) in  $\text{CDCl}_3$ .
- Figure S16**  $^{13}\text{C-NMR}$  spectrum of 3,4,5-dimethoxycinnamyl alcohol (**4**) in  $\text{CDCl}_3$ .
- Figure S17**  $^1\text{H-NMR}$  spectrum of dihydrosesamin (**5**) in  $\text{CDCl}_3$ .
- Figure S18**  $^{13}\text{C-NMR}$  spectrum of dihydrosesamin (**5**) in  $\text{CDCl}_3$ .
- Figure S19**  $^1\text{H-NMR}$  spectrum of 4'-O-demethylepipodophyllotoxin (**6**) in  $\text{CDCl}_3$ .
- Figure S20**  $^{13}\text{C-NMR}$  spectrum of 4'-O-demethylepipodophyllotoxin (**6**) in  $\text{CDCl}_3$ .
- Figure S21**  $^1\text{H-NMR}$  spectrum of 7-hydroxy coumarin (**7**) in  $\text{CDCl}_3$  and acetone- $d_6$  (1:1).
- Figure S22**  $^{13}\text{C-NMR}$  spectrum of 7-hydroxy coumarin (**7**) in  $\text{CDCl}_3$  and acetone- $d_6$  (1:1).
- Figure S23**  $^1\text{H-NMR}$  spectrum of 7- $\beta$ -D-glucosyloxy coumarin (**8**) in  $\text{CD}_3\text{OD}$ .
- Figure S24**  $^{13}\text{C-NMR}$  spectrum of 7- $\beta$ -D-glucosyloxy coumarin (**8**) in  $\text{CD}_3\text{OD}$ .
- Figure S25**  $^1\text{H-NMR}$  spectrum of 1- $\beta$ -D-glucosyloxy-2-(3,4-methylenedioxyphenyl)-propane-1,3-diol (**9**) in  $\text{CD}_3\text{OD}$ .
- Figure S26**  $^{13}\text{C-NMR}$  spectrum of 1- $\beta$ -D-glucosyloxy-2-(3,4-methylenedioxyphenyl)-propane-1,3-diol (**9**) in  $\text{CD}_3\text{OD}$ .
- Figure S27**  $^1\text{H-NMR}$  spectrum of 1 $\beta$ ,6 $\alpha$ -dihydroxy-4(14)-eudesmene (**10**) in  $\text{CDCl}_3$ .
- Figure S28**  $^{13}\text{C-NMR}$  spectrum of 1 $\beta$ ,6 $\alpha$ -dihydroxy-4(14)-eudesmene (**10**) in  $\text{CDCl}_3$ .
- Figure S29**  $^1\text{H-NMR}$  spectrum of selin-4(15)-en-1 $\beta$ , 11-diol (**11**) in  $\text{CDCl}_3$ .
- Figure S30**  $^{13}\text{C-NMR}$  spectrum of selin-4(15)-en-1 $\beta$ , 11-diol (**11**) in  $\text{CDCl}_3$ .
- Figure S31**  $^1\text{H-NMR}$  spectrum of 4-eudesmene-1 $\beta$ ,11-diol (**12**) in  $\text{CDCl}_3$ .
- Figure S32**  $^{13}\text{C-NMR}$  spectrum of 4-eudesmene-1 $\beta$ ,11-diol (**12**) in  $\text{CDCl}_3$ .
- Figure S33**  $^1\text{H-NMR}$  spectrum of 7-*epi*-4-eudesmene-1 $\beta$ ,11-diol (**13**) in  $\text{CDCl}_3$ .
- Figure S34**  $^{13}\text{C-NMR}$  spectrum of 7-*epi*-4-eudesmene-1 $\beta$ ,11-diol (**13**) in  $\text{CDCl}_3$ .
- Figure S35**  $^1\text{H-NMR}$  spectrum of 3-eudesmene-1 $\beta$ ,11-diol (**14**) in  $\text{CDCl}_3$ .
- Figure S36**  $^{13}\text{C-NMR}$  spectrum of 3-eudesmene-1 $\beta$ ,11-diol (**14**) in  $\text{CDCl}_3$ .
- Figure S37**  $^1\text{H-NMR}$  spectrum of 8 $\alpha$ ,11-elemodiol (**15**) in acetone- $d_6$ .
- Figure S38**  $^{13}\text{C-NMR}$  spectrum of 8 $\alpha$ ,11-elemodiol (**15**) in acetone- $d_6$ .
- Figure S39**  $^1\text{H-NMR}$  spectrum of hinokiic acid (**16**) in  $\text{CDCl}_3$ .
- Figure S40**  $^{13}\text{C-NMR}$  spectrum of hinokiic acid (**16**) in  $\text{CDCl}_3$ .
- Figure S41**  $^1\text{H-NMR}$  spectrum of corchoionoside C (**17**) in  $\text{CD}_3\text{OD}$ .
- Figure S42**  $^{13}\text{C-NMR}$  spectrum of corchoionoside C (**17**) in  $\text{CD}_3\text{OD}$ .

**Figure S43**  $^1\text{H-NMR}$  spectrum of hinokiol (**18**) in pyridine- $d_6$ .

**Figure S44**  $^{13}\text{C-NMR}$  spectrum of hinokiol (**18**) in pyridine- $d_6$ .

**Figure S45**  $^1\text{H-NMR}$  spectrum of isocupressic acid (**19**) in  $\text{CDCl}_3$ .

**Figure S46**  $^{13}\text{C-NMR}$  spectrum of isocupressic acid (**19**) in  $\text{CDCl}_3$ .

**Figure S47**  $^1\text{H-NMR}$  spectrum of sitostenone (**20**) in  $\text{CDCl}_3$ .

**Figure S48**  $^{13}\text{C-NMR}$  spectrum of sitostenone (**20**) in  $\text{CDCl}_3$ .

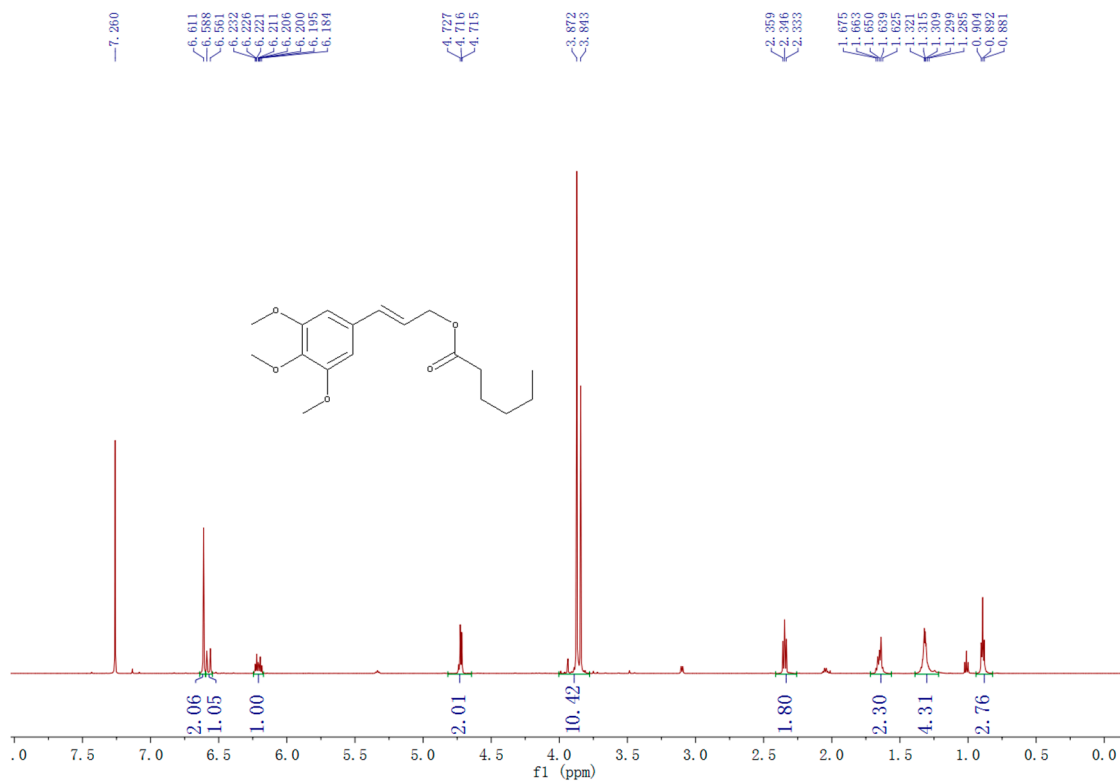

**Figure S1.**  $^1\text{H-NMR}$  spectrum of 3,4,5-trimethoxycinnamyl caproate (**1**) in  $\text{CDCl}_3$ .

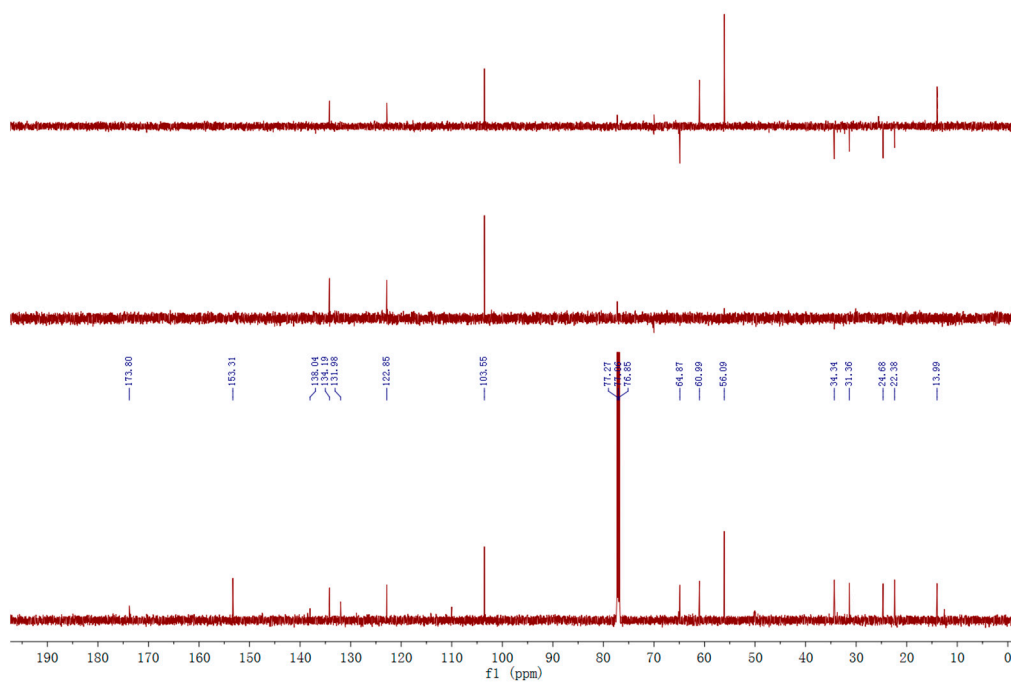

**Figure S2.**  $^{13}\text{C-NMR}$  and DEPT spectra of 3,4,5-trimethoxycinnamyl caproate (**1**) in  $\text{CDCl}_3$ .

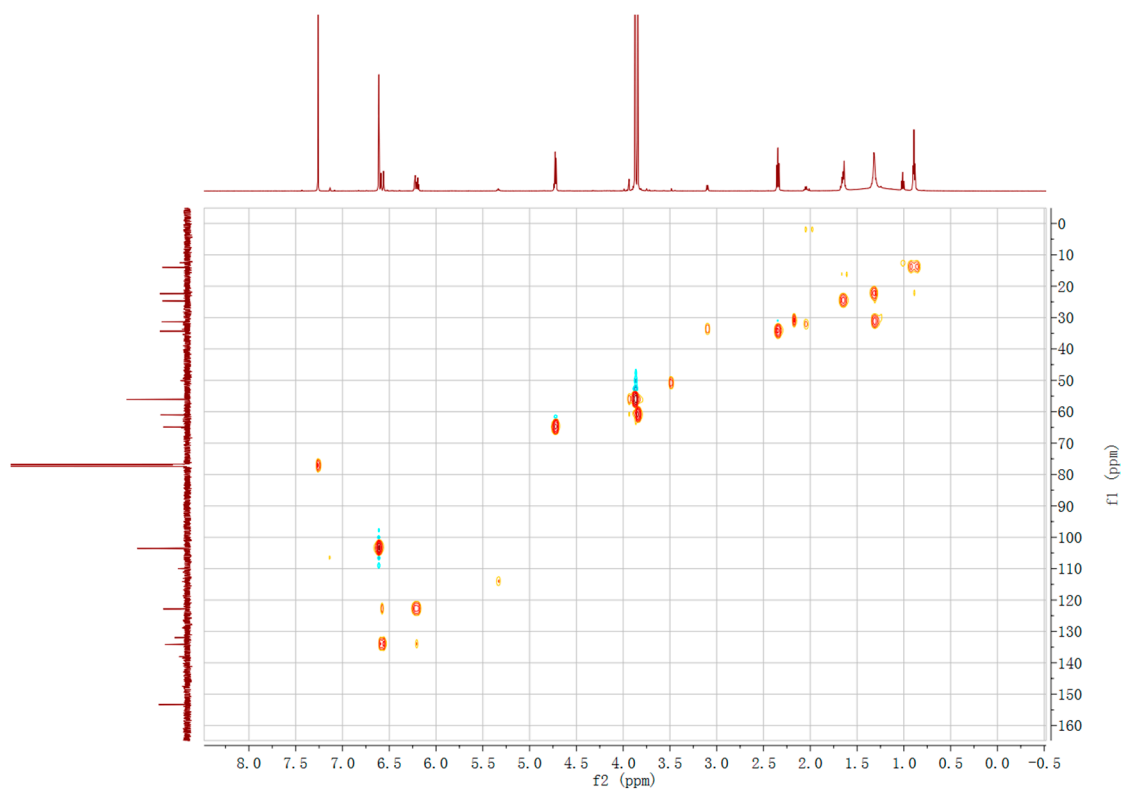

Figure S3. HSQC spectrum of 3,4,5-trimethoxycinnamyl caproate (1) in CDCl<sub>3</sub>.

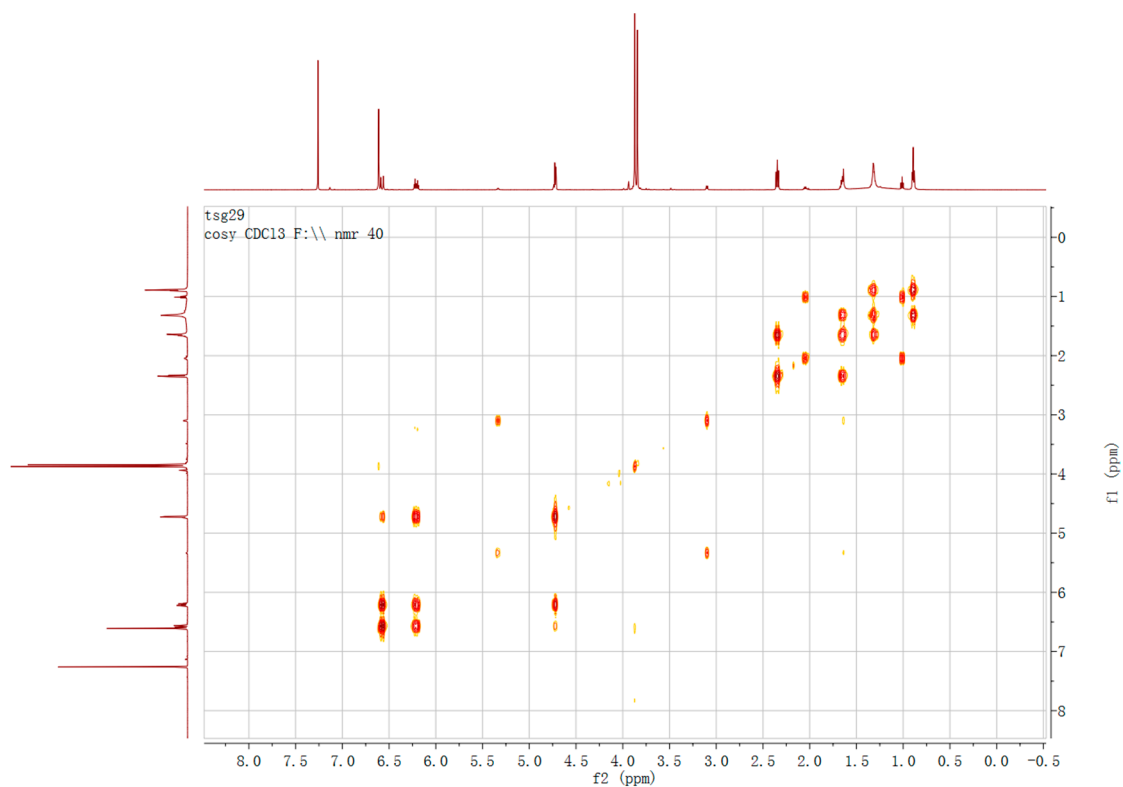

Figure S4. <sup>1</sup>H-<sup>1</sup>H COSY spectrum of 1 3,4,5-trimethoxycinnamyl caproate (1) in CDCl<sub>3</sub>.

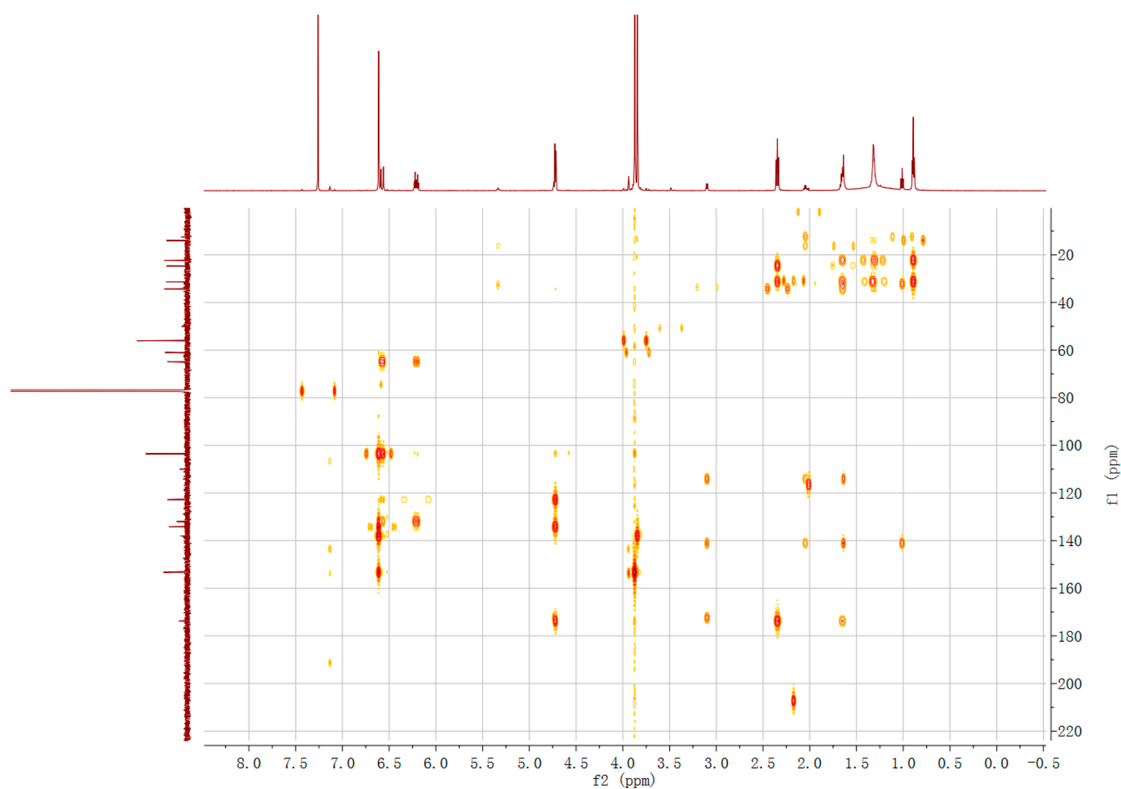

Figure S5. HMBC spectrum of 3',4',5'-trimethoxycinnamyl caproate (1) in CDCl<sub>3</sub>.

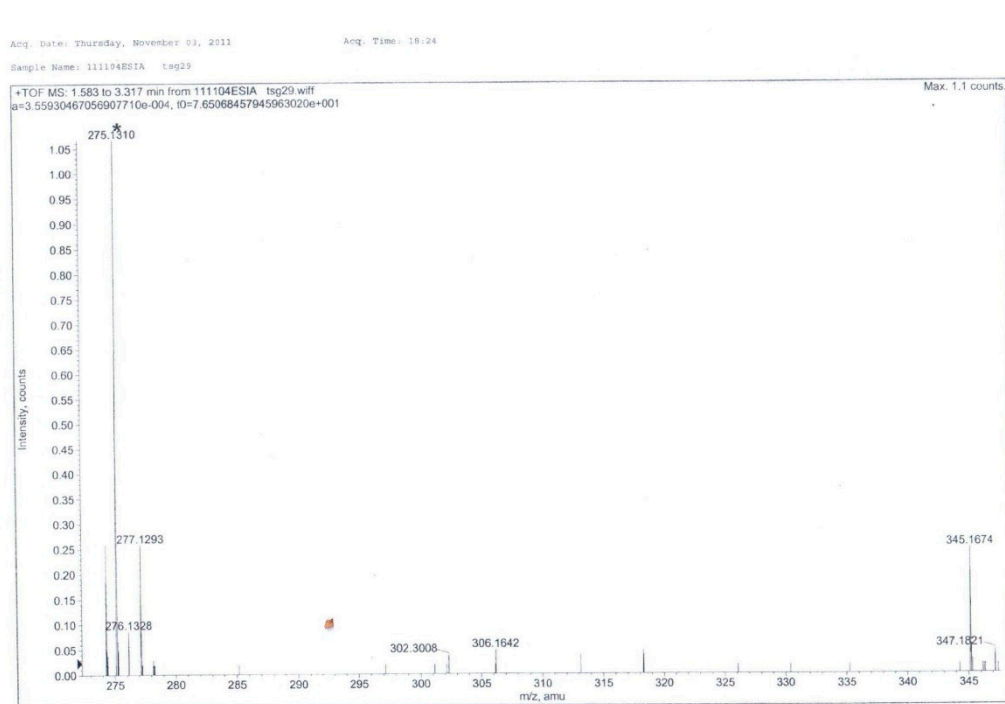

Figure S6. HR-ESI-MS spectrum of 3',4',5'-trimethoxycinnamyl caproate (1) in CDCl<sub>3</sub>.



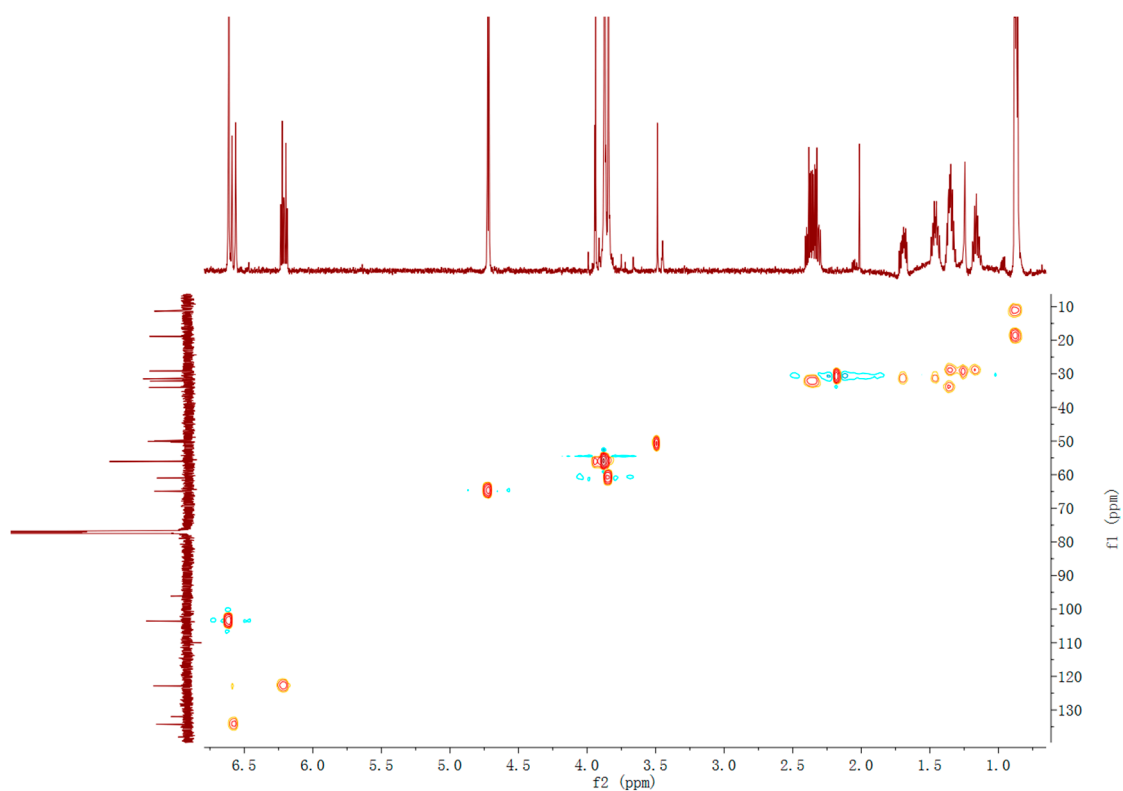

Figure S9. HSQC spectrum of 3,4,5-trimethoxycinnamyl-4''-methyl-caproate (2) in CDCl<sub>3</sub>.

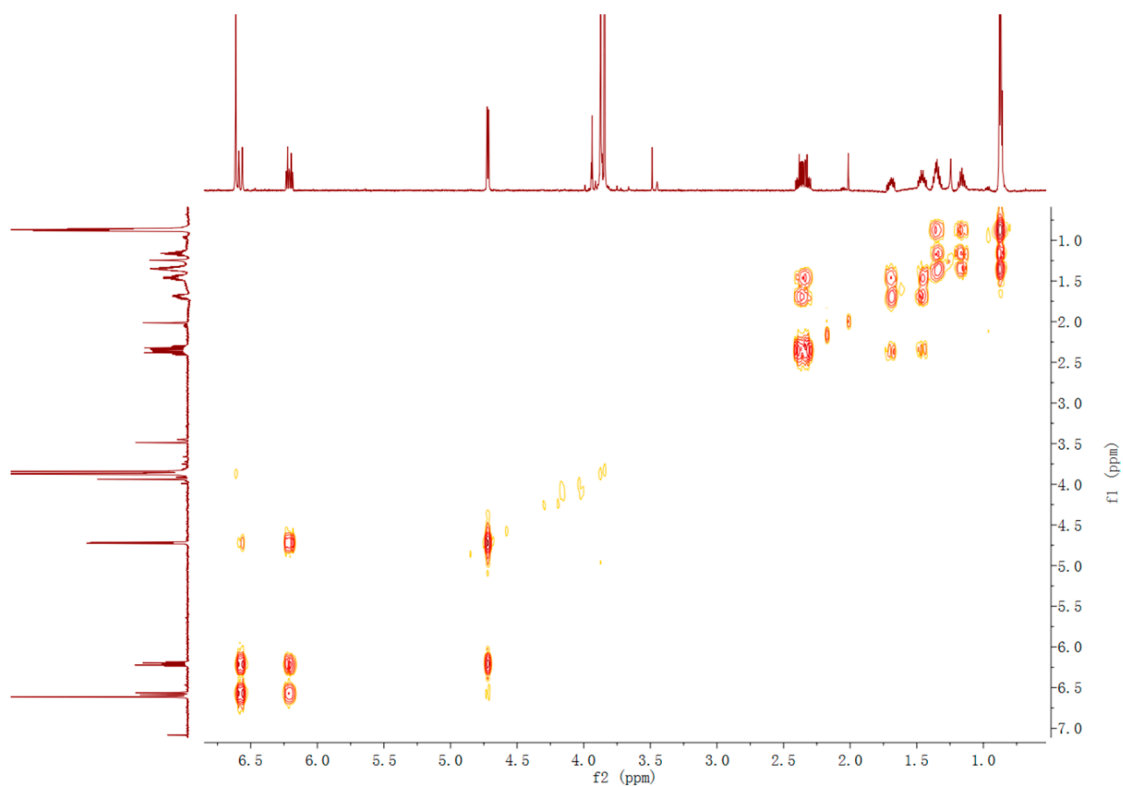

Figure S10. <sup>1</sup>H-<sup>1</sup>H COSY spectrum of 3,4,5-trimethoxycinnamyl-4''-methyl-caproate (2) in CDCl<sub>3</sub>.

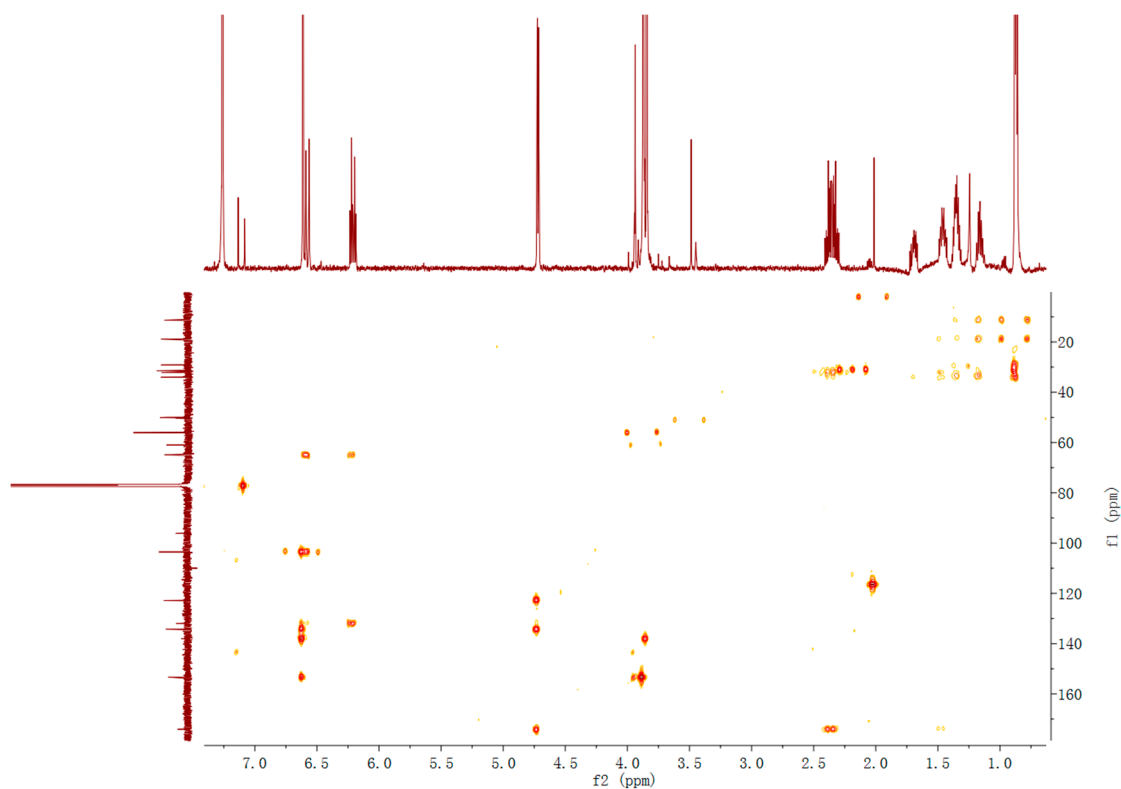

Figure S11. HMBC spectrum of 3,4,5-trimethoxycinnamyl-4''-methyl-caproate (2) in CDCl<sub>3</sub>.

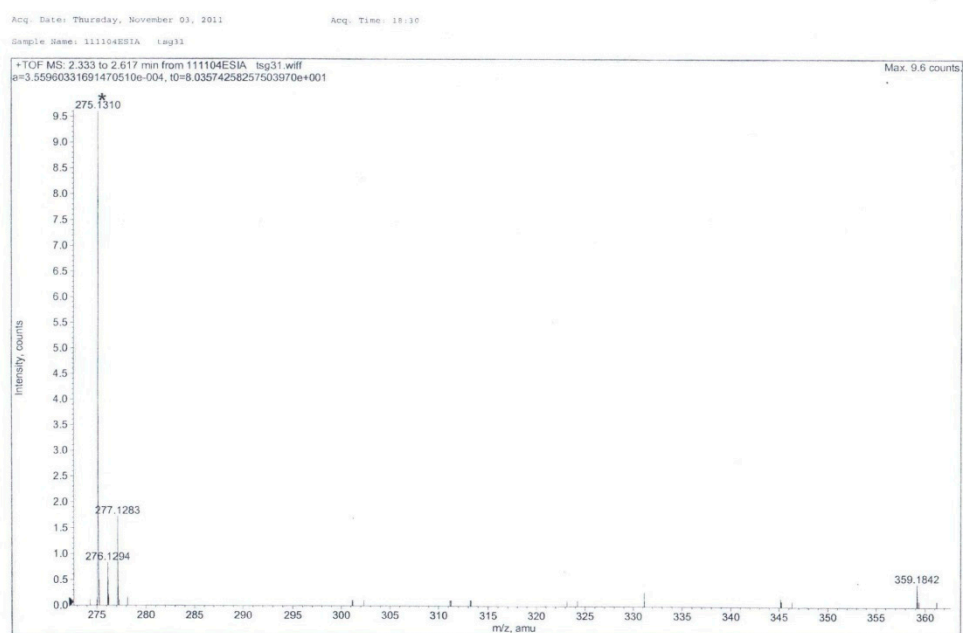

Figure S12. HR-ESI-MS spectrum of 3,4,5-trimethoxycinnamyl-4''-methyl-caproate (2) in CDCl<sub>3</sub>.

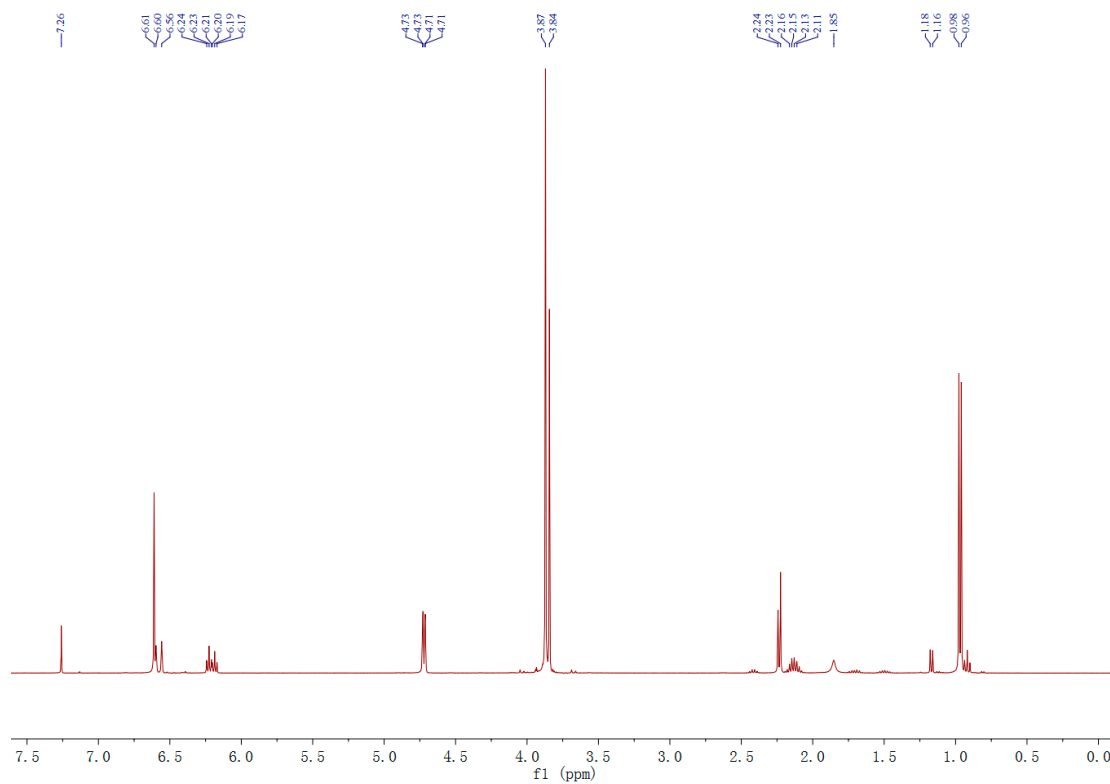

Figure S13.  $^1\text{H}$ -NMR spectrum of 3,4,5-dimethoxycinnamyl isovalerate (**3**) in  $\text{CDCl}_3$ .

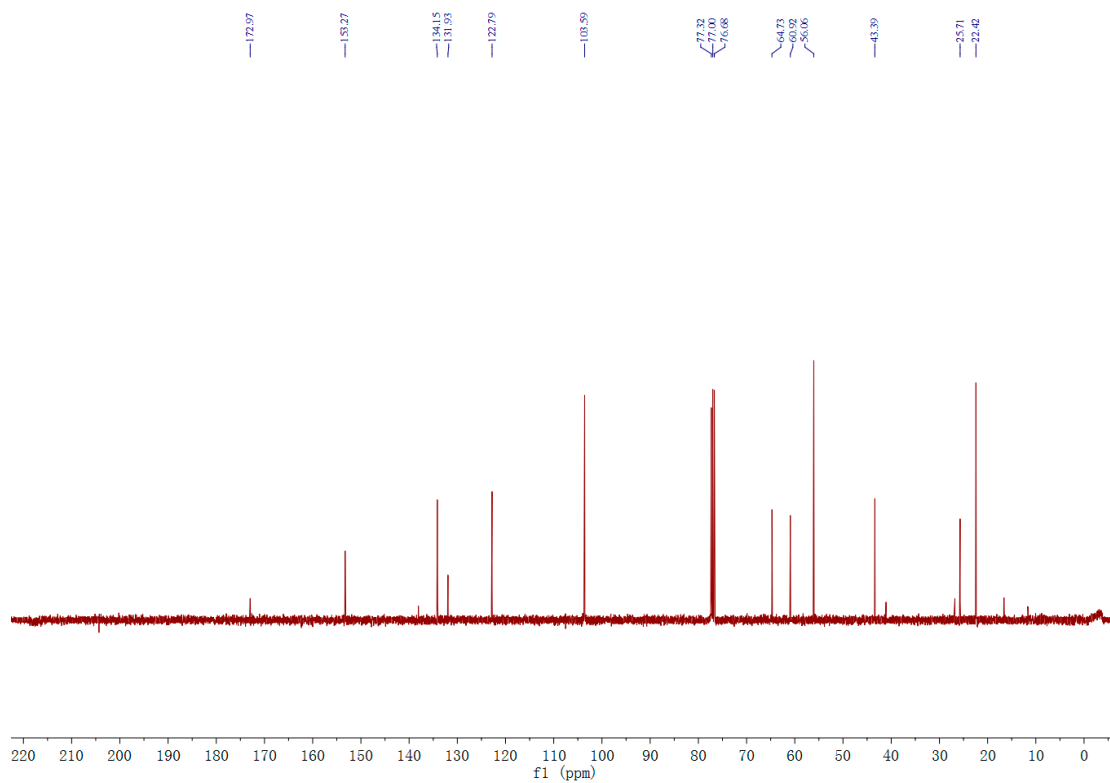

Figure S14  $^{13}\text{C}$ -NMR spectrum of 3,4,5-dimethoxycinnamyl isovalerate (**3**) in  $\text{CDCl}_3$ .



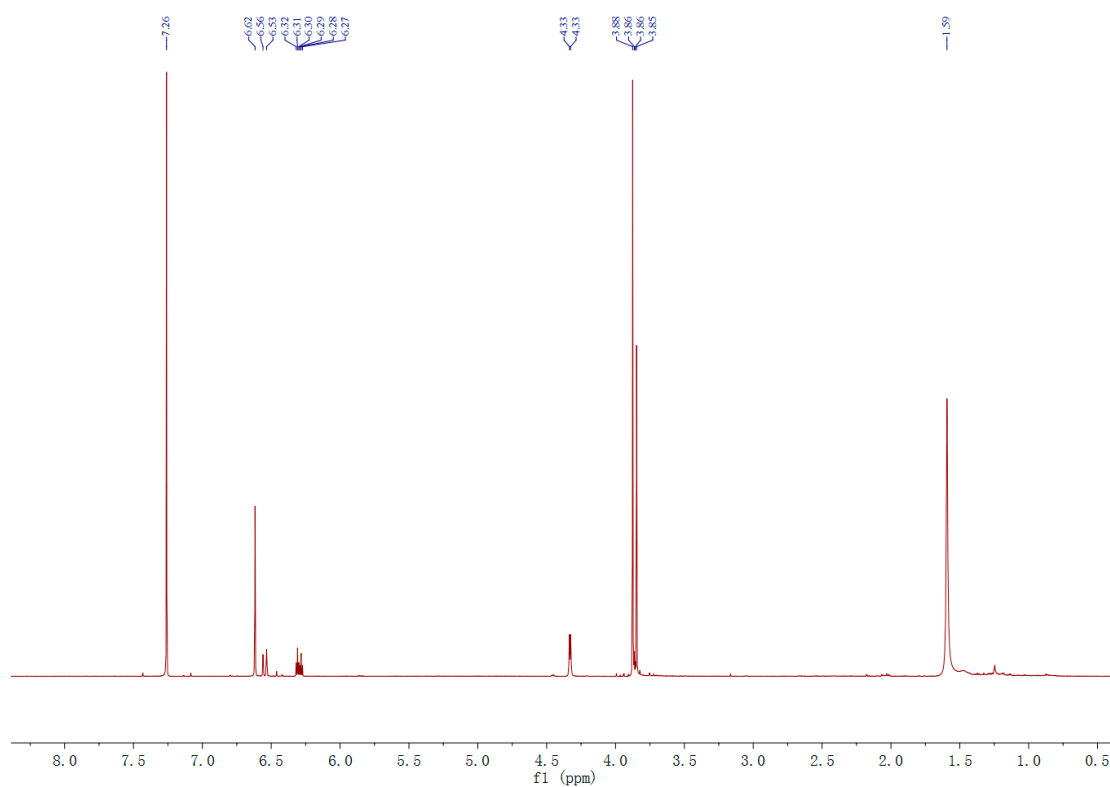

Figure S15.  $^1\text{H-NMR}$  spectrum of 3,4,5-dimethoxycinnamyl alcohol (**4**) in  $\text{CDCl}_3$ .

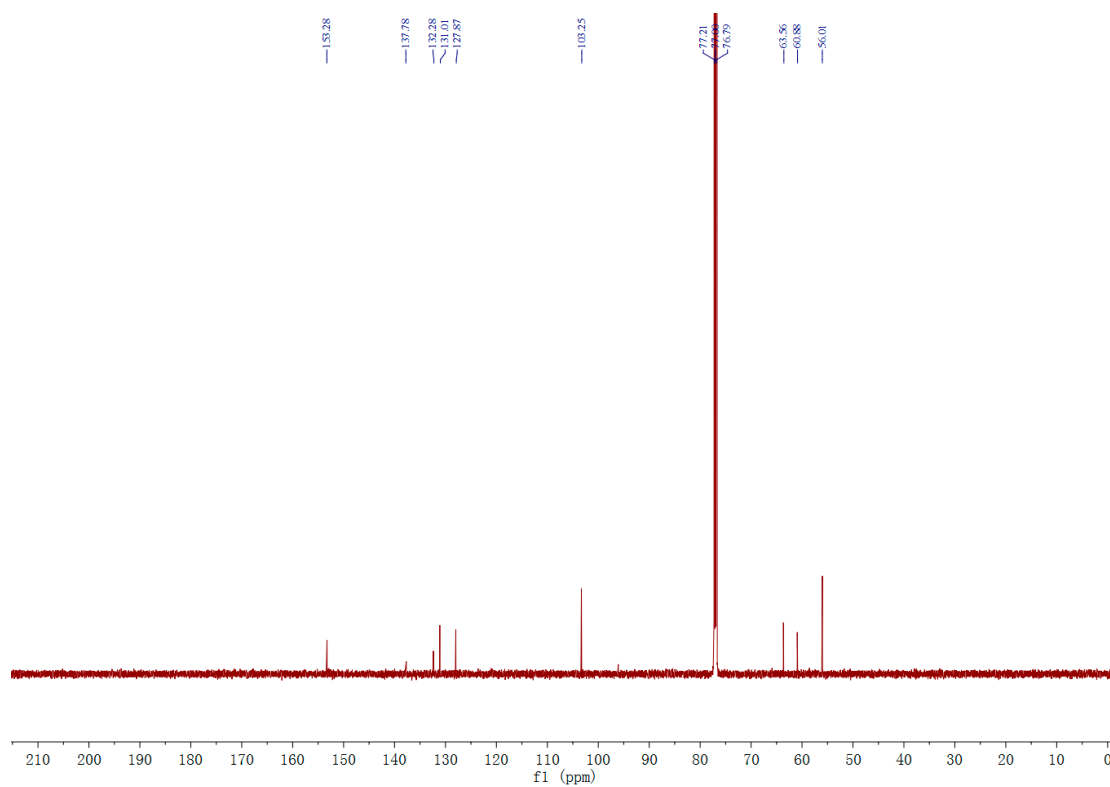

Figure S16.  $^{13}\text{C-NMR}$  spectrum of 3,4,5-dimethoxycinnamyl alcohol (**4**) in  $\text{CDCl}_3$ .

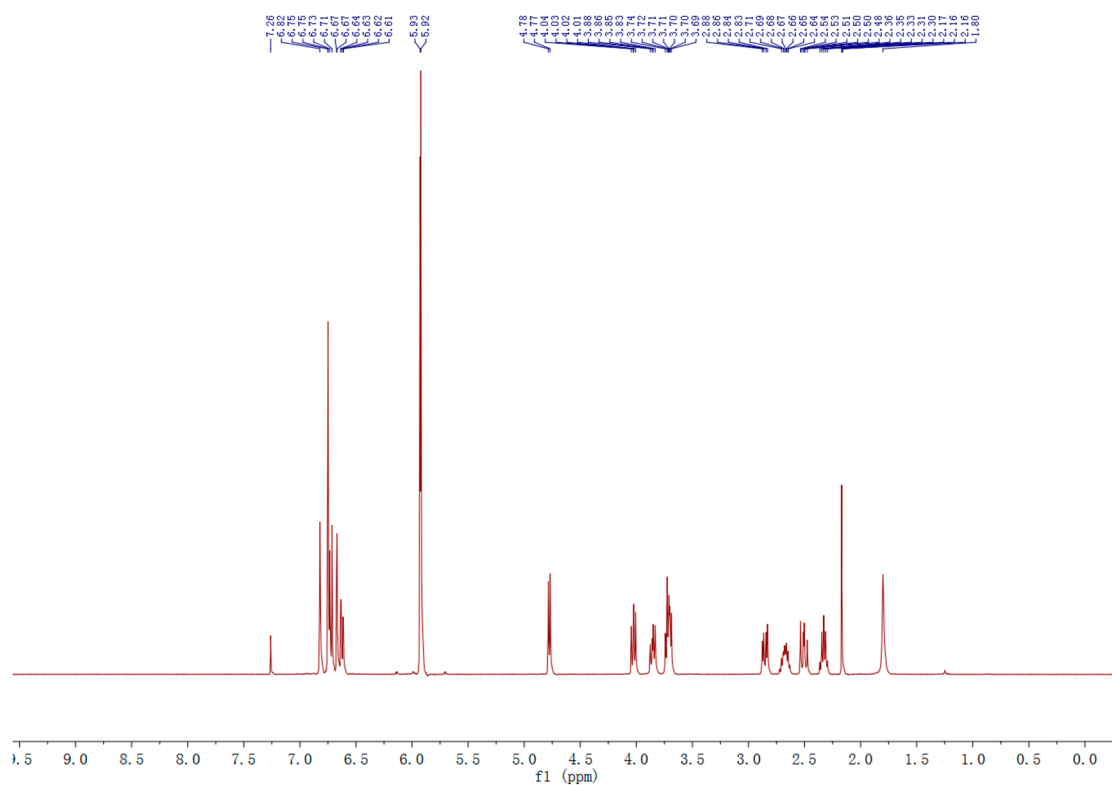Figure S17. <sup>1</sup>H-NMR spectrum of dihydrosesamin (5) in CDCl<sub>3</sub>.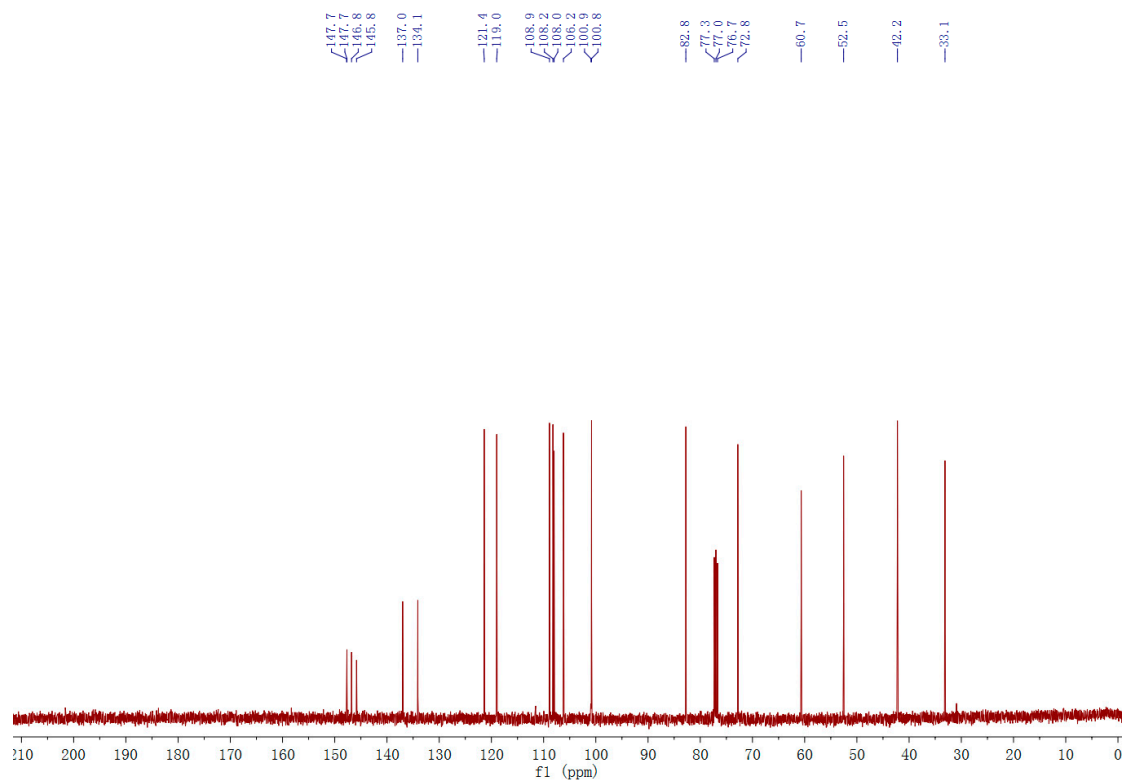Figure S18. <sup>13</sup>C-NMR spectrum of dihydrosesamin (5) in CDCl<sub>3</sub>.

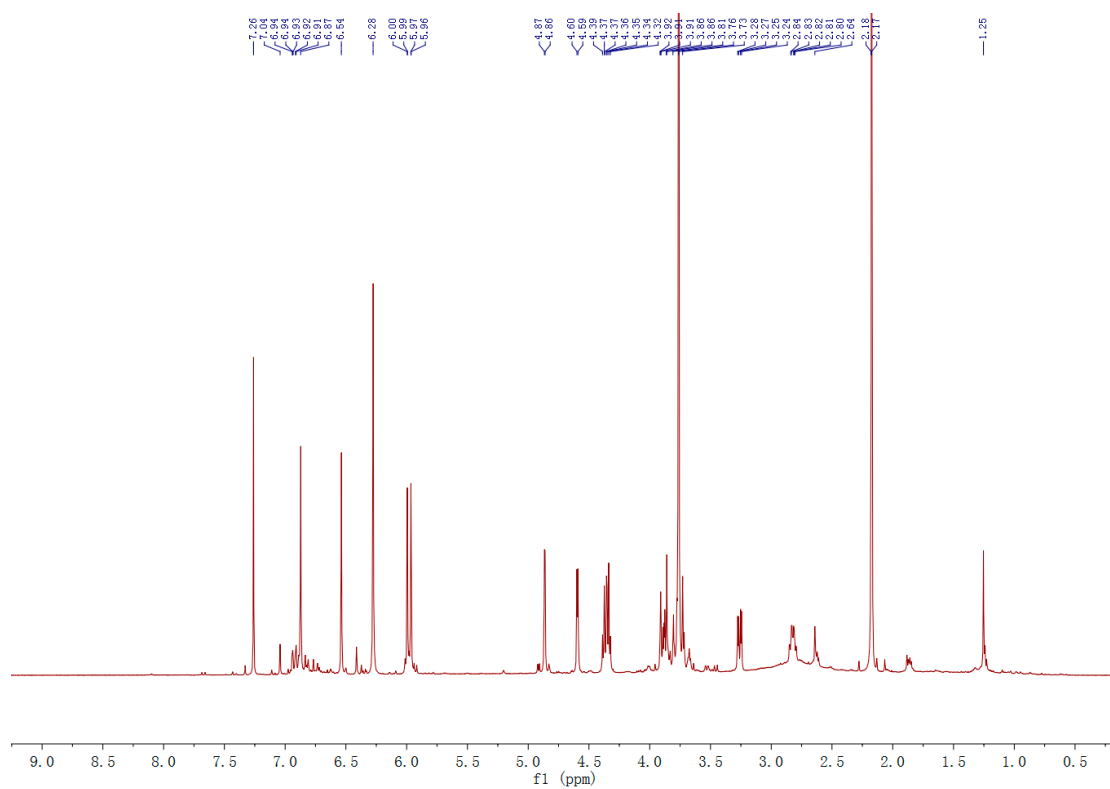

Figure S19.  $^1\text{H-NMR}$  spectrum of 4'-O-demethylepipodophyllotoxin (6) in  $\text{CDCl}_3$ .

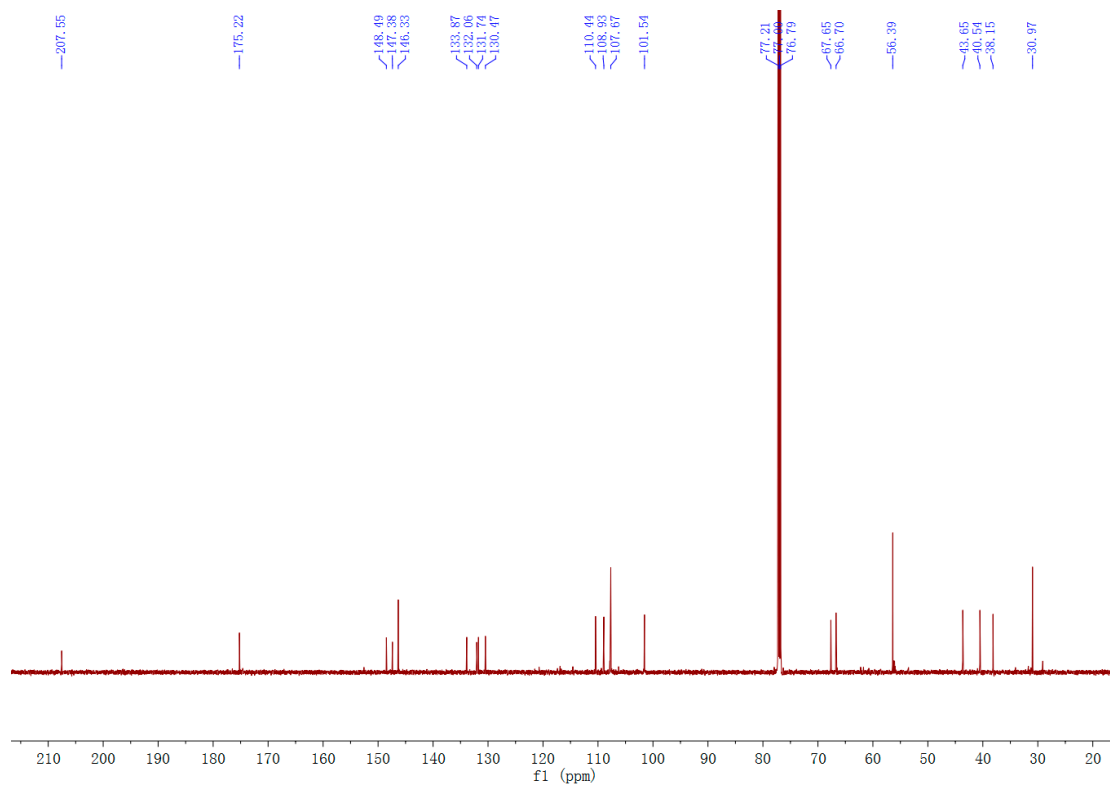

Figure S20.  $^{13}\text{C-NMR}$  spectrum of 4'-O-demethylepipodophyllotoxin (6) in  $\text{CDCl}_3$ .

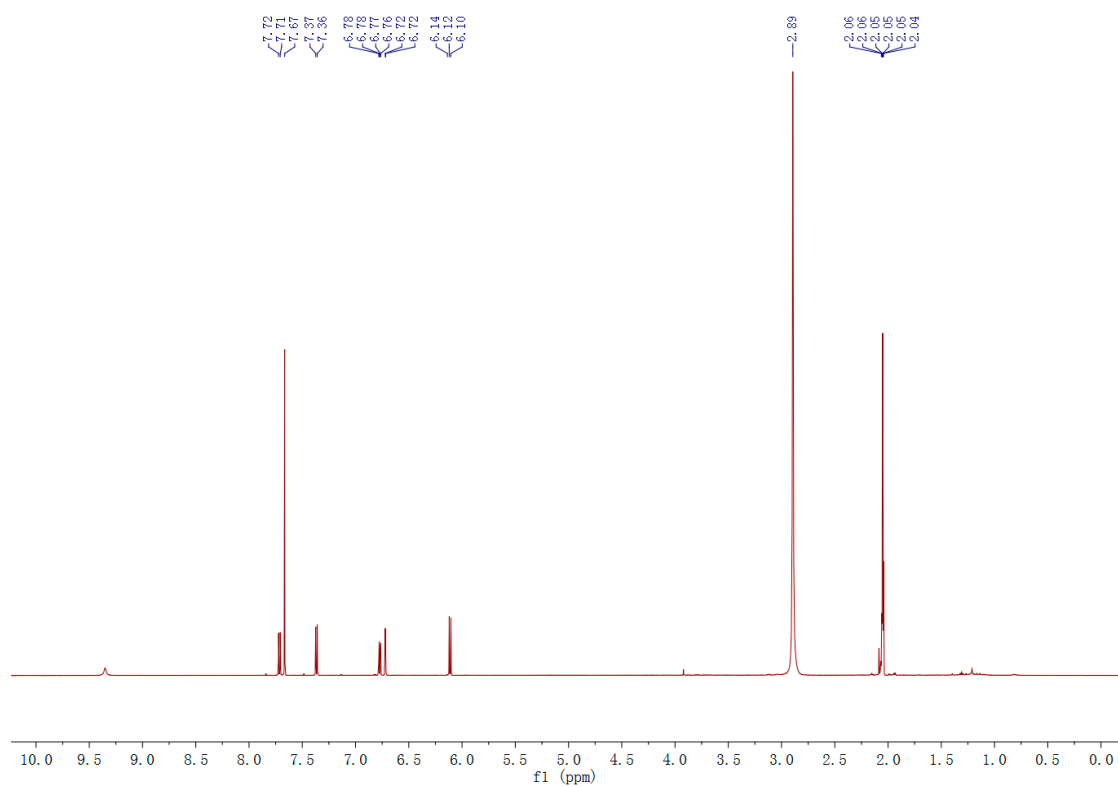

Figure S21.  $^1\text{H-NMR}$  spectrum of 7-hydroxy coumarin (**7**) in  $\text{CDCl}_3$  and acetone- $d_6$  (1:1).

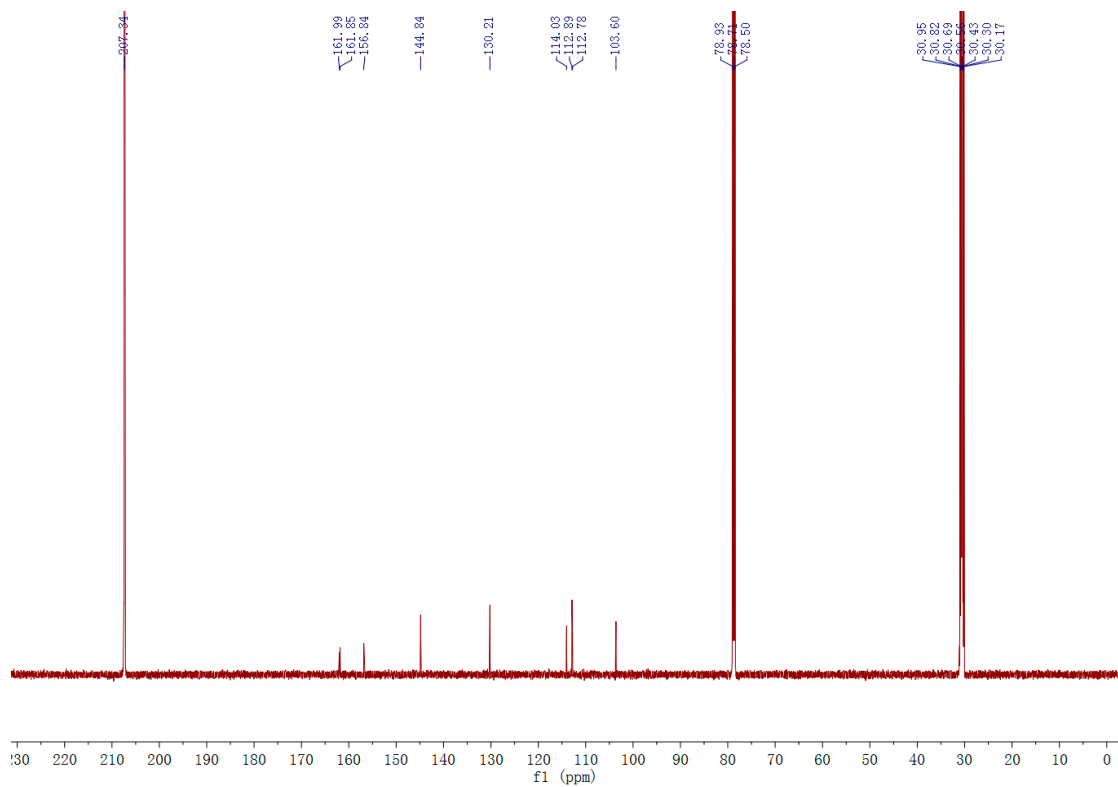

Figure S22.  $^{13}\text{C-NMR}$  spectrum of 7-hydroxy coumarin (**7**) in  $\text{CDCl}_3$  and acetone- $d_6$  (1:1).

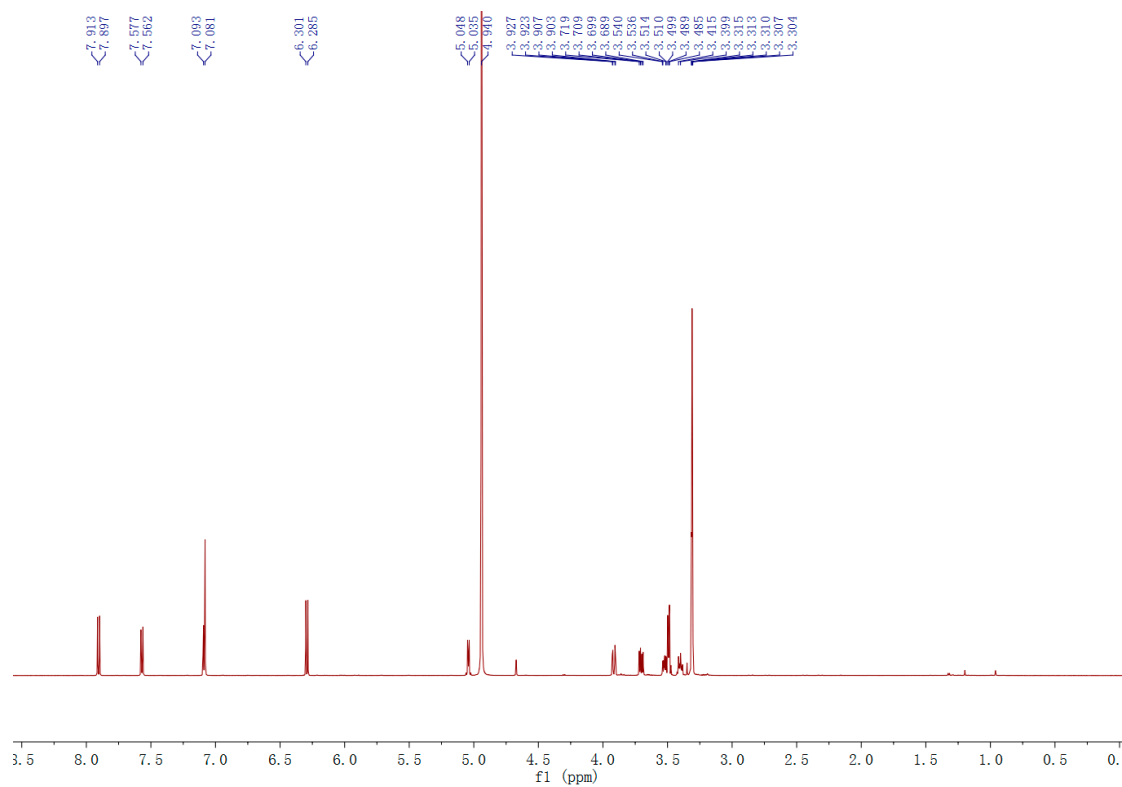

Figure S23.  $^1\text{H-NMR}$  spectrum of 7- $\beta$ -D-glucosyloxy coumarin (8) in  $\text{CD}_3\text{OD}$ .

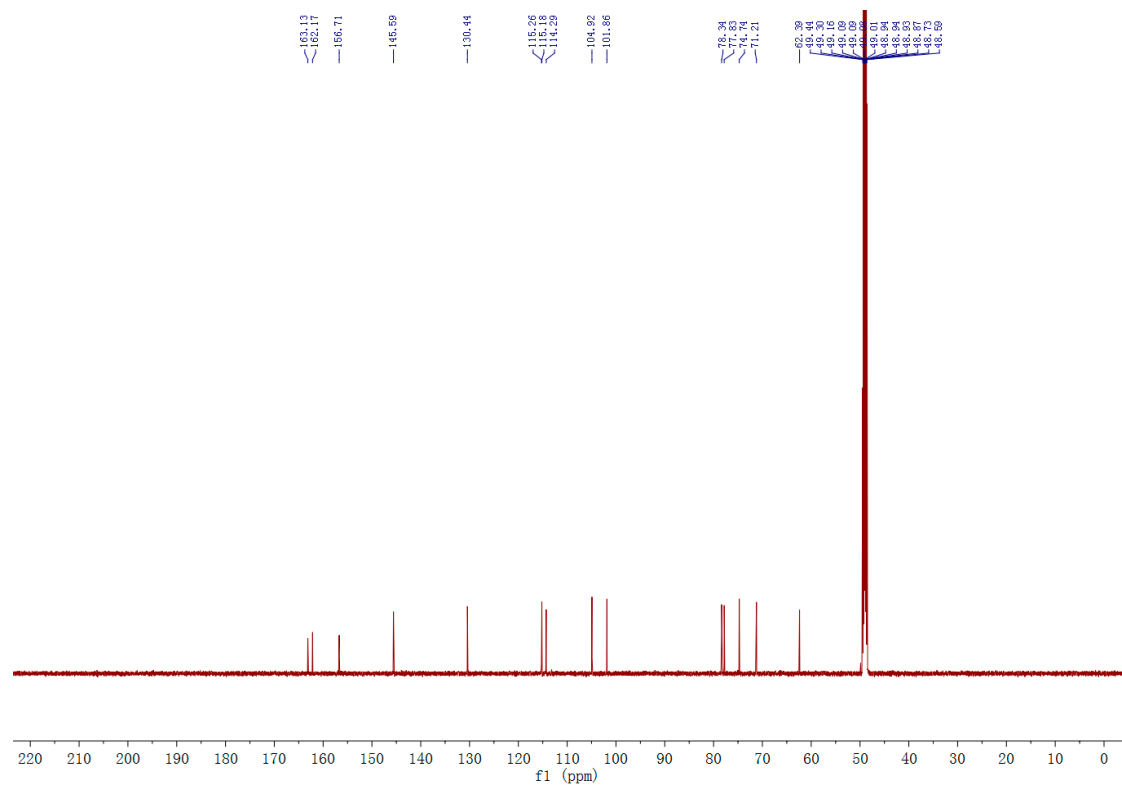

Figure S24  $^{13}\text{C-NMR}$  spectrum of 7- $\beta$ -D-glucosyloxy coumarin (8) in  $\text{CD}_3\text{OD}$ .

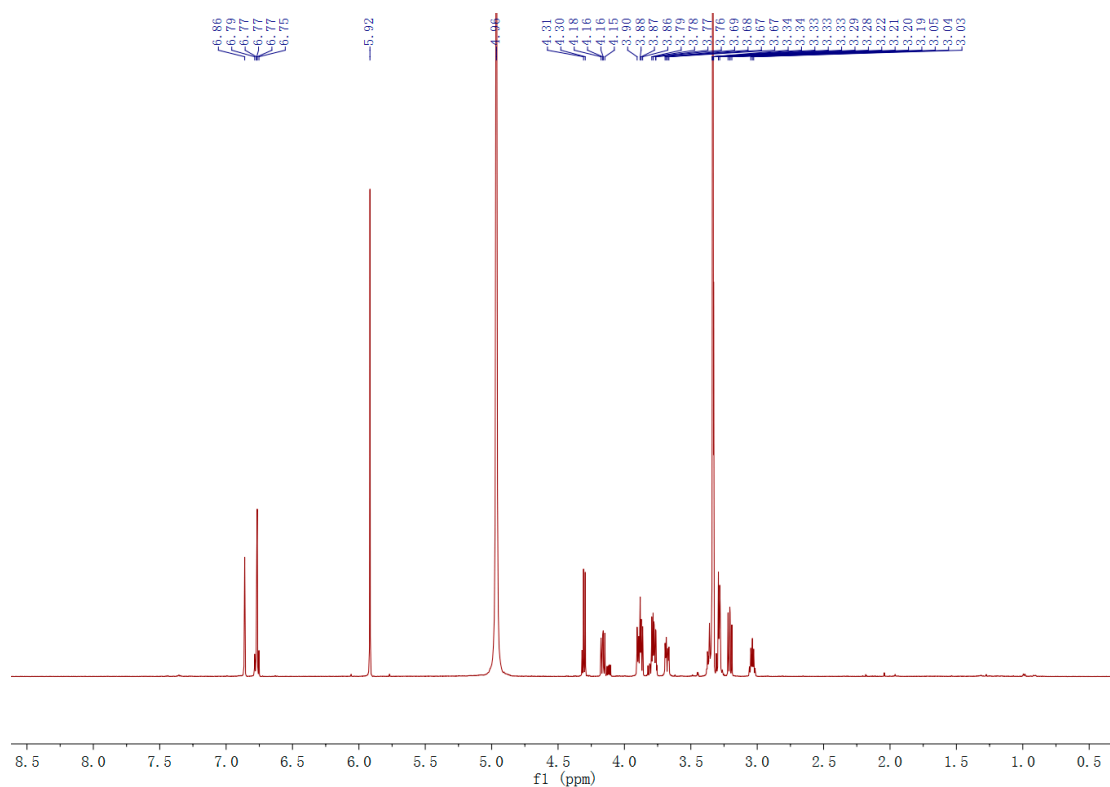

Figure S25.  $^1\text{H-NMR}$  spectrum of 1- $\beta$ -D-glucosyloxy-2-(3,4-methylenedioxyphenyl)-propane-1,3-diol (**9**) in  $\text{CD}_3\text{OD}$ .

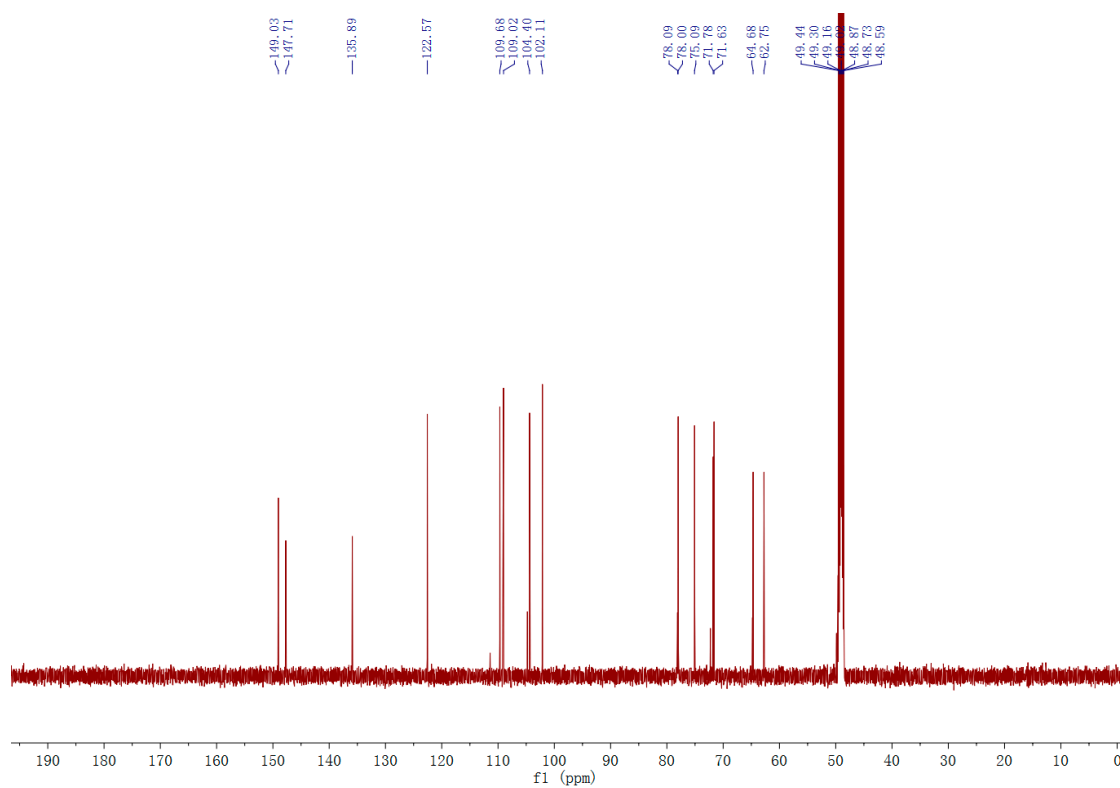

Figure S26.  $^{13}\text{C-NMR}$  spectrum of 1- $\beta$ -D-glucosyloxy-2-(3,4-methylenedioxyphenyl)-propane-1,3-diol (**9**) in  $\text{CD}_3\text{OD}$ .

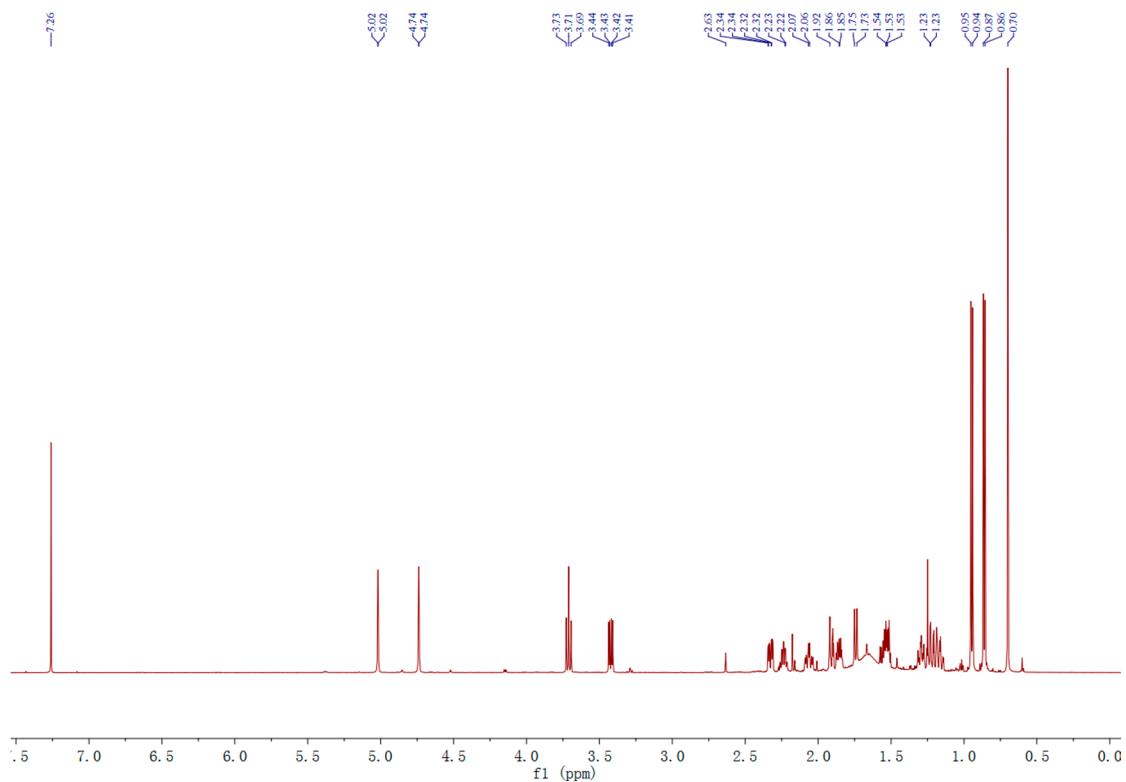

Figure S27.  $^1\text{H-NMR}$  spectrum of  $1\beta,6\alpha$ -dihydroxy-4(14)-eudesmene (**10**) in  $\text{CDCl}_3$ .

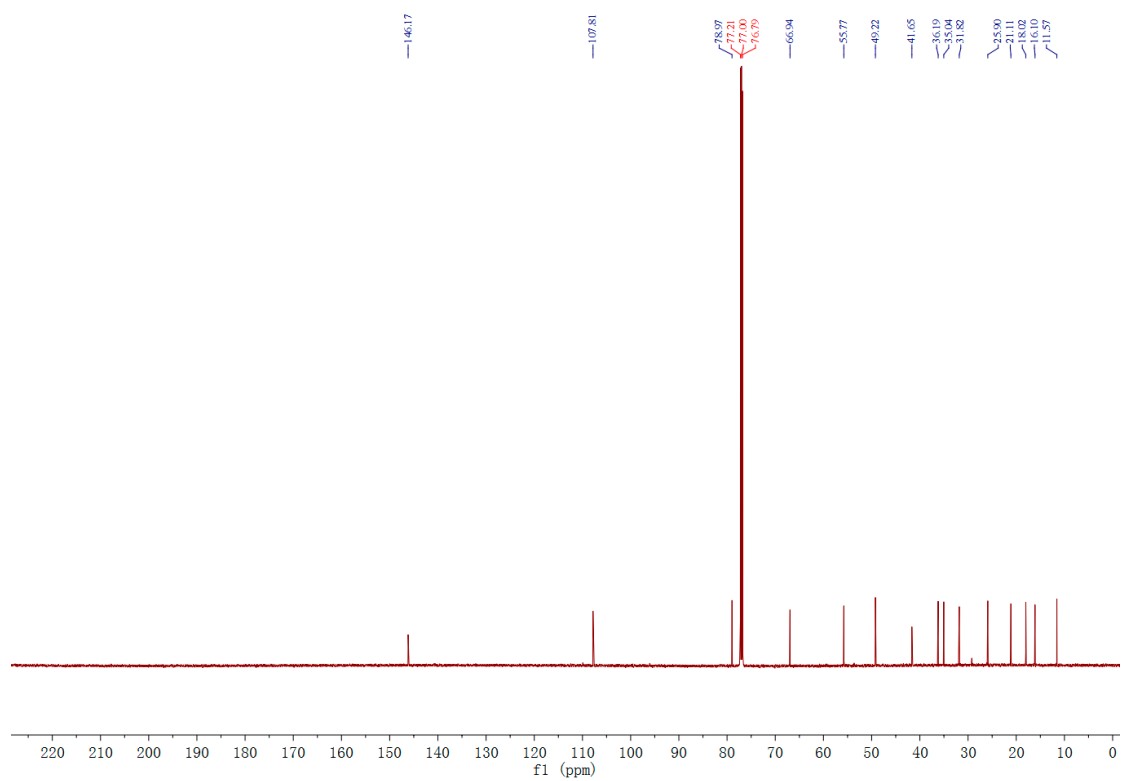

Figure S28.  $^{13}\text{C-NMR}$  spectrum of  $1\beta,6\alpha$ -dihydroxy-4(14)-eudesmene (**10**) in  $\text{CDCl}_3$ .

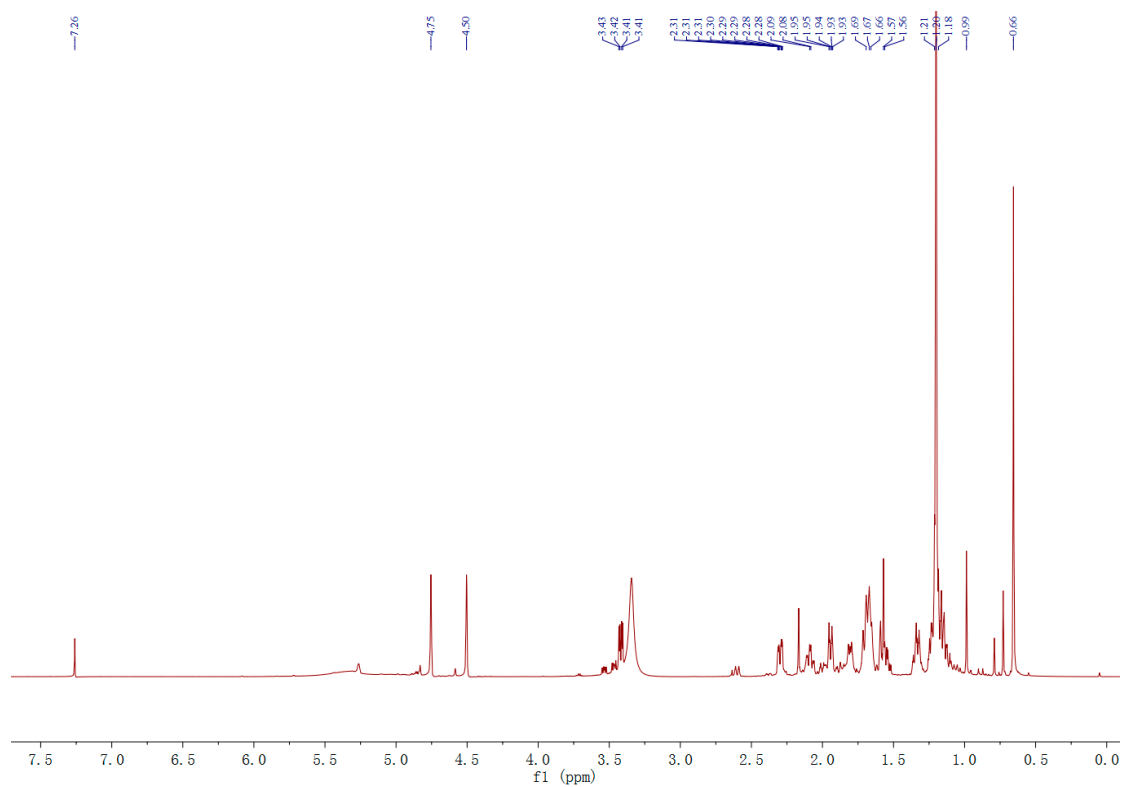

Figure S29.  $^1\text{H}$ -NMR spectrum of selin-4(15)-en-1 $\beta$ ,11-diol (**11**) in  $\text{CDCl}_3$ .

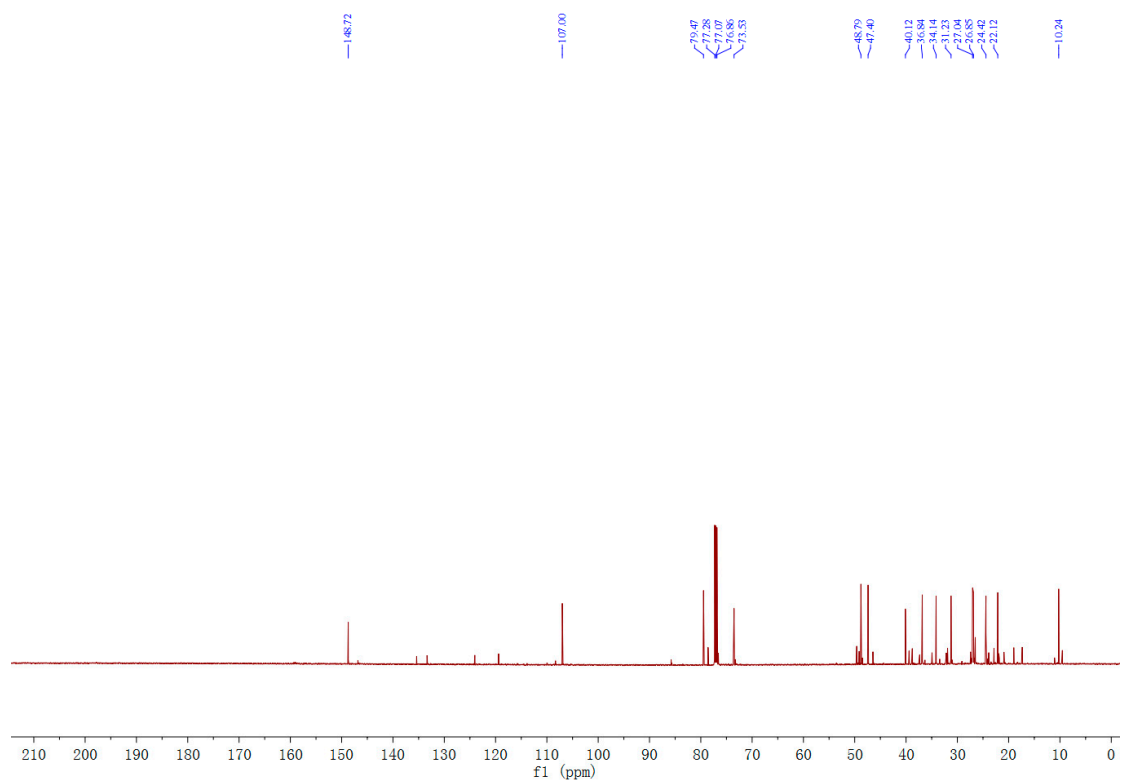

Figure S30.  $^{13}\text{C}$ -NMR spectrum of selin-4(15)-en-1 $\beta$ ,11-diol (**11**) in  $\text{CDCl}_3$ .



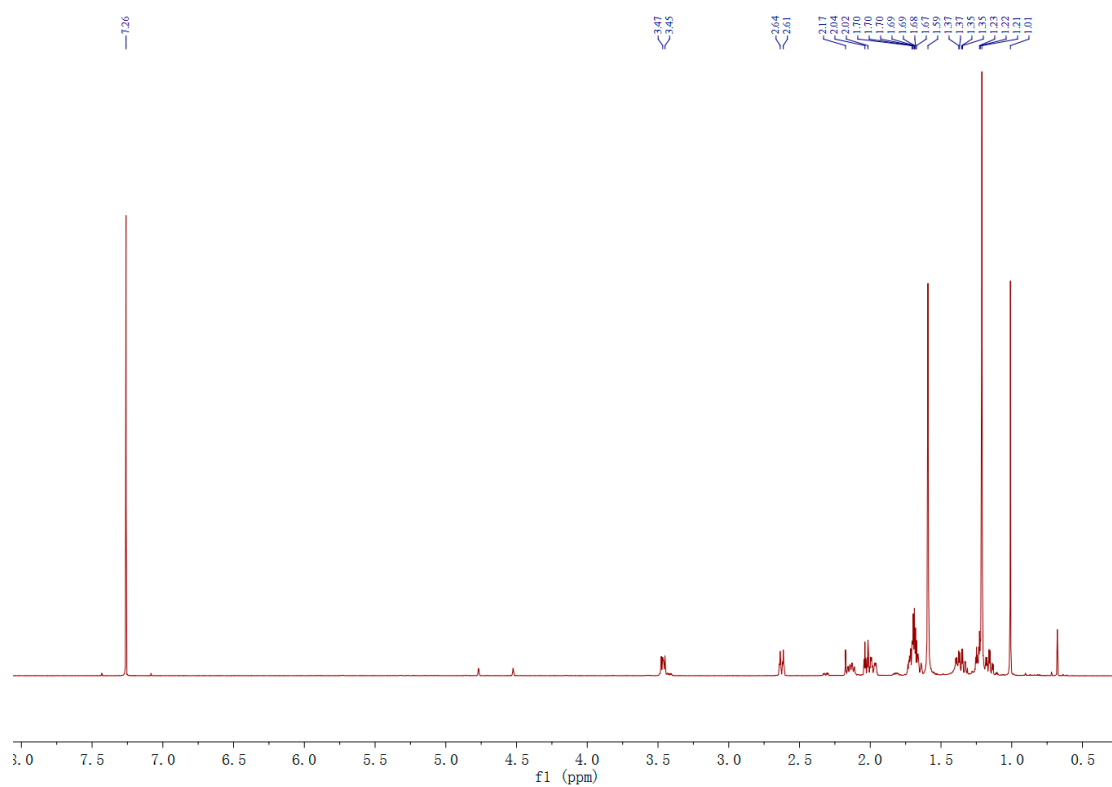

Figure S31.  $^1\text{H}$ -NMR spectrum of 4-eudesmene-1 $\beta$ ,11-diol (**12**) in  $\text{CDCl}_3$ .

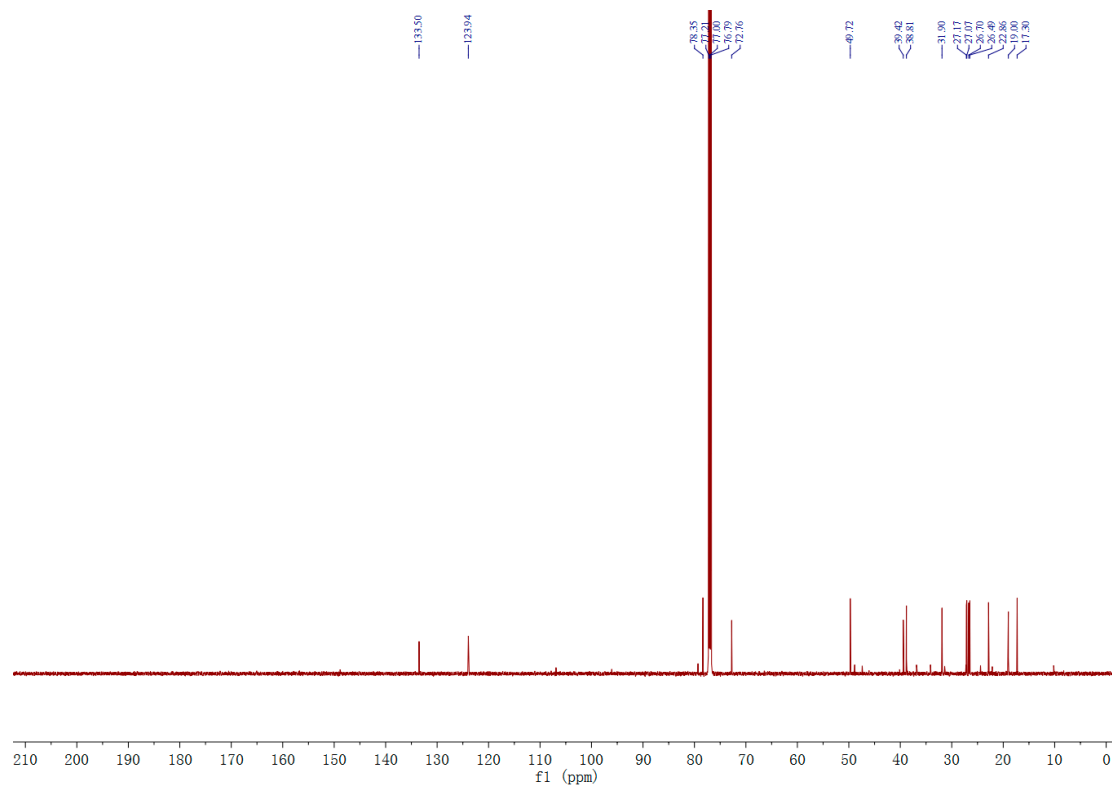

Figure S32.  $^{13}\text{C}$ -NMR spectrum of 4-eudesmene-1 $\beta$ ,11-diol (**12**) in  $\text{CDCl}_3$ .

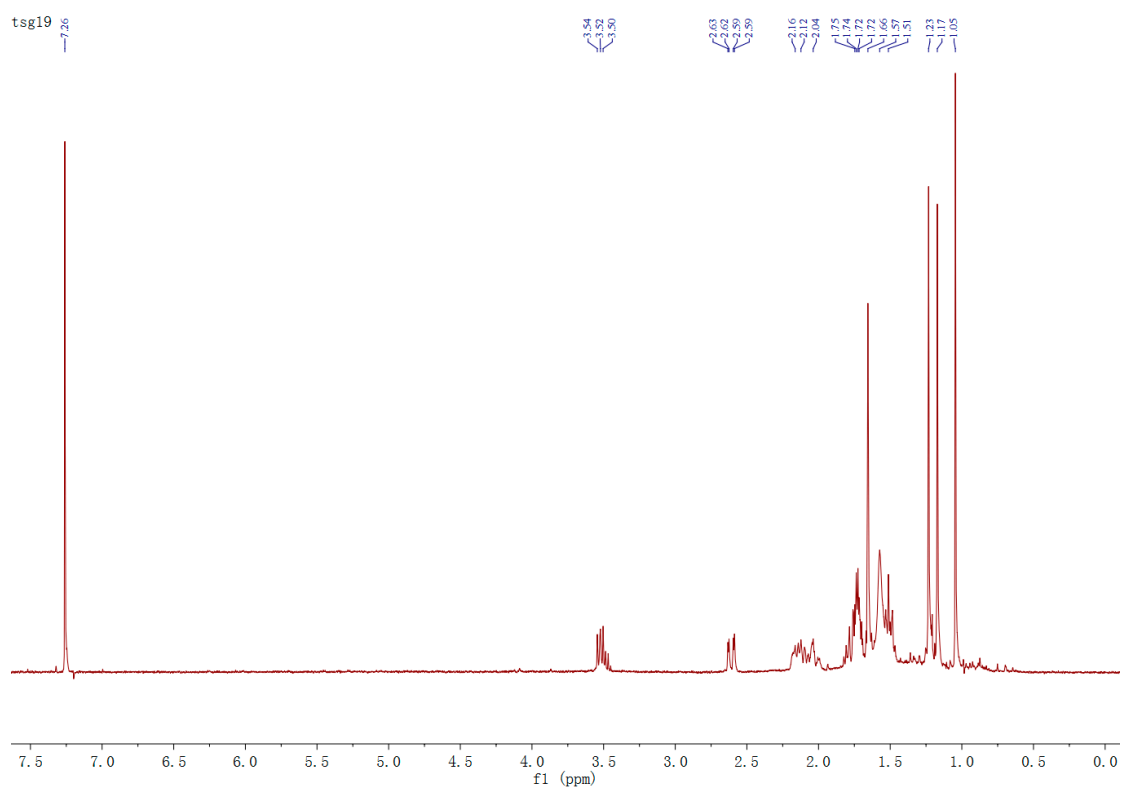

Figure S33. <sup>1</sup>H-NMR spectrum of 7-epi-4-eudesmene-1 $\beta$ ,11-diol (**13**) in CDCl<sub>3</sub>.

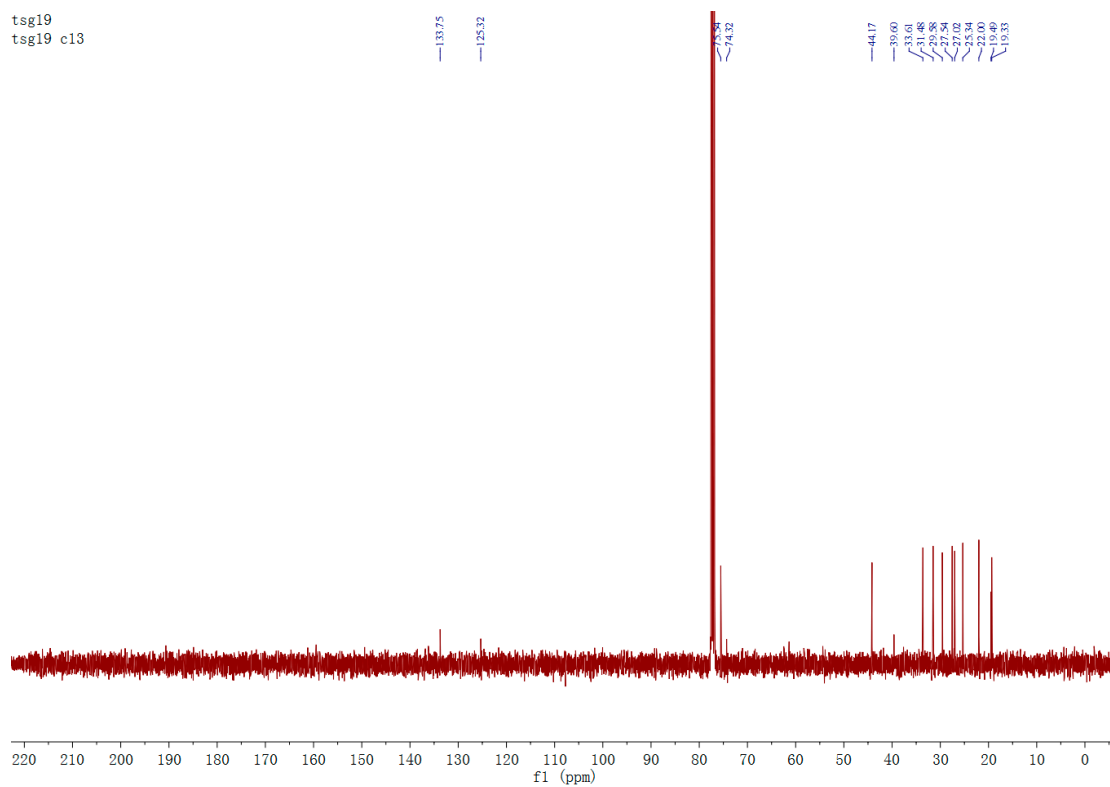

Figure S34. <sup>13</sup>C-NMR spectrum of 7-epi-4-eudesmene-1 $\beta$ ,11-diol (**13**) in CDCl<sub>3</sub>.

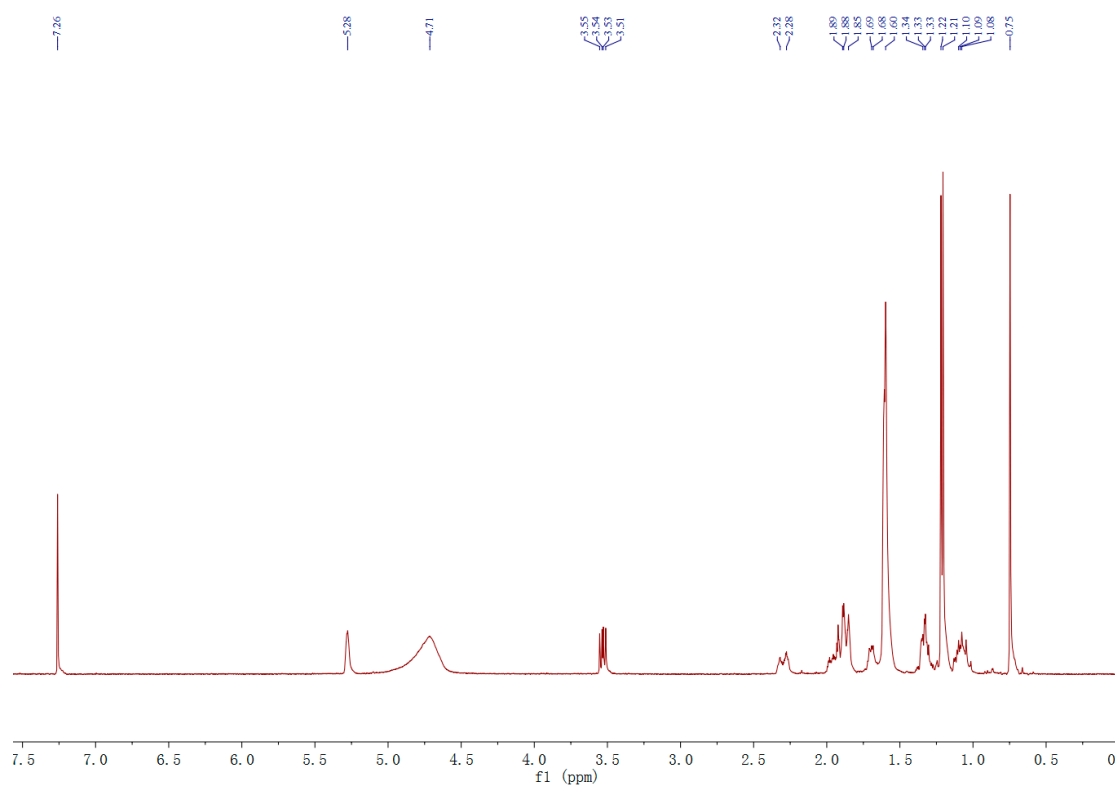

Figure S35.  $^1\text{H}$ -NMR spectrum of 3-eudesmene-1 $\beta$ ,11-diol (**14**) in  $\text{CDCl}_3$ .

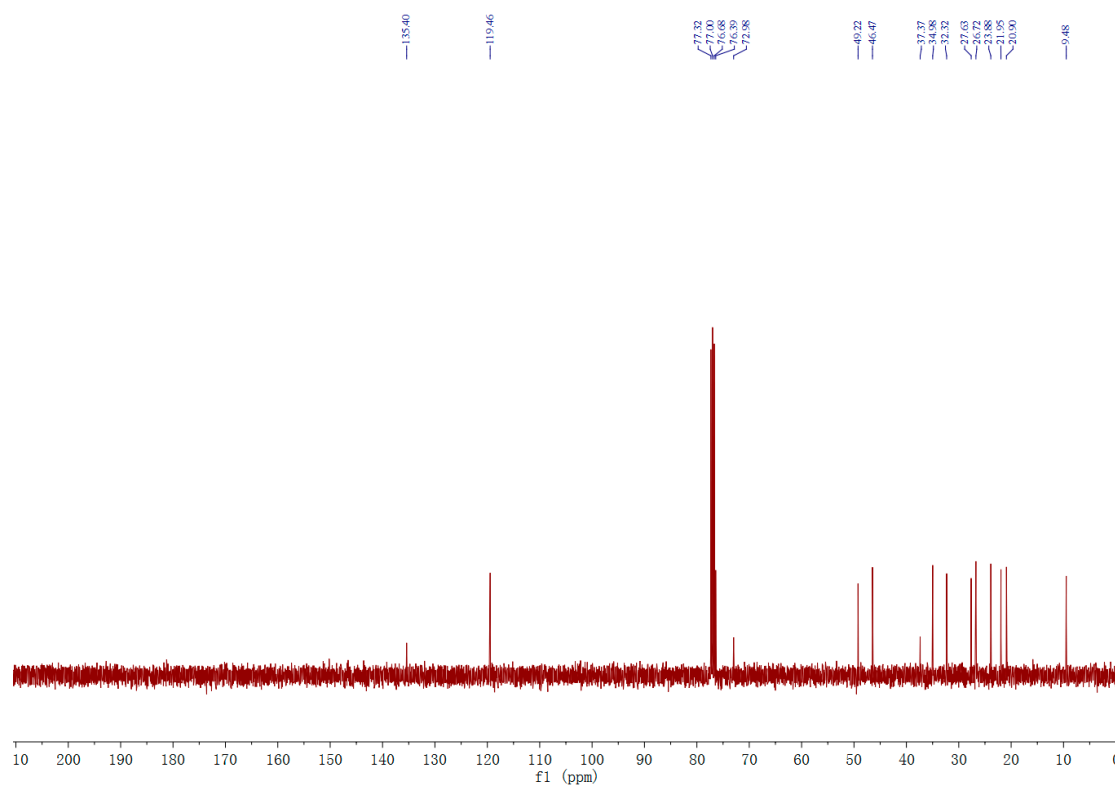

Figure S36.  $^{13}\text{C}$ -NMR spectrum of 3-eudesmene-1 $\beta$ ,11-diol (**14**) in  $\text{CDCl}_3$ .

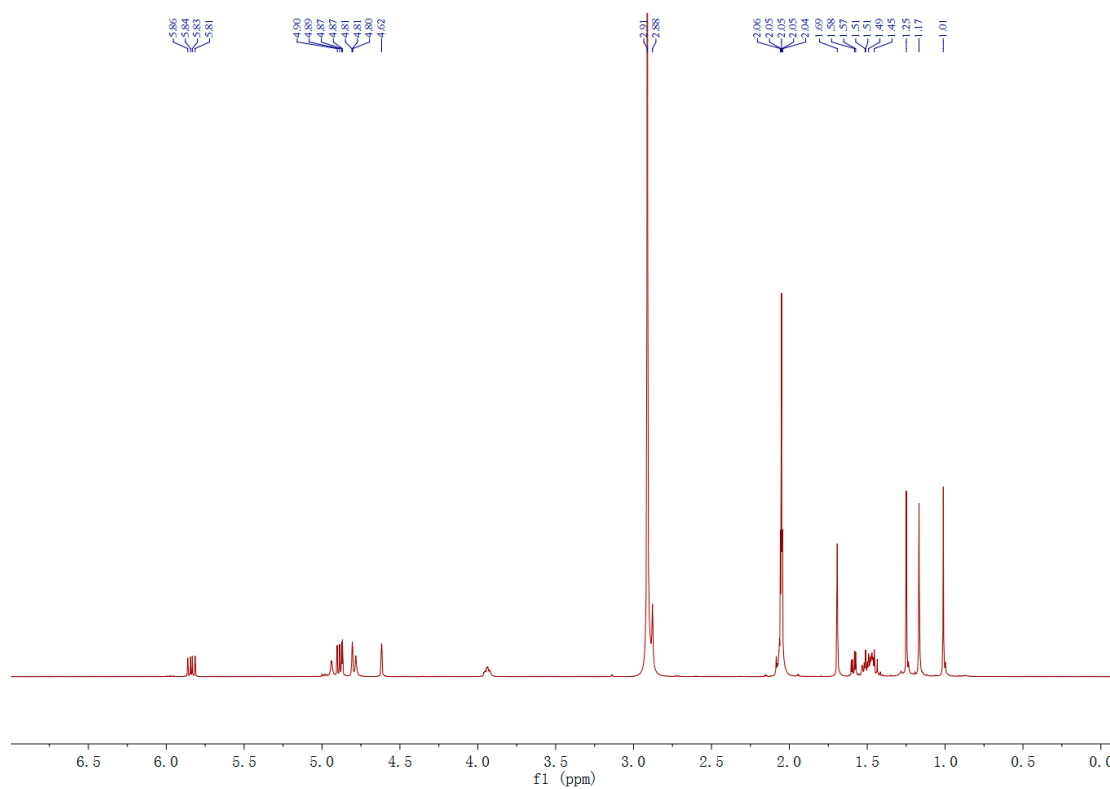

Figure S37.  $^1\text{H-NMR}$  spectrum of 8 $\alpha$ ,11-elemodiol (**15**) in acetone- $d_6$ .

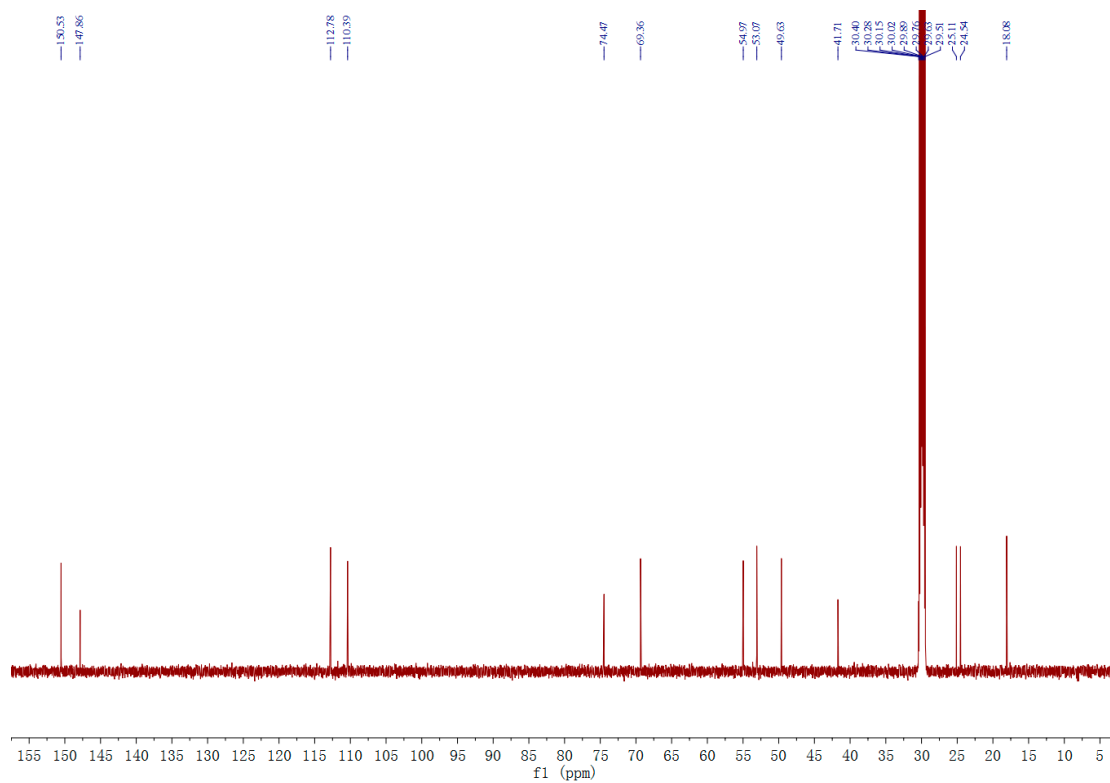

Figure S38.  $^{13}\text{C-NMR}$  spectrum of 8 $\alpha$ ,11-elemodiol (**15**) in acetone- $d_6$ .

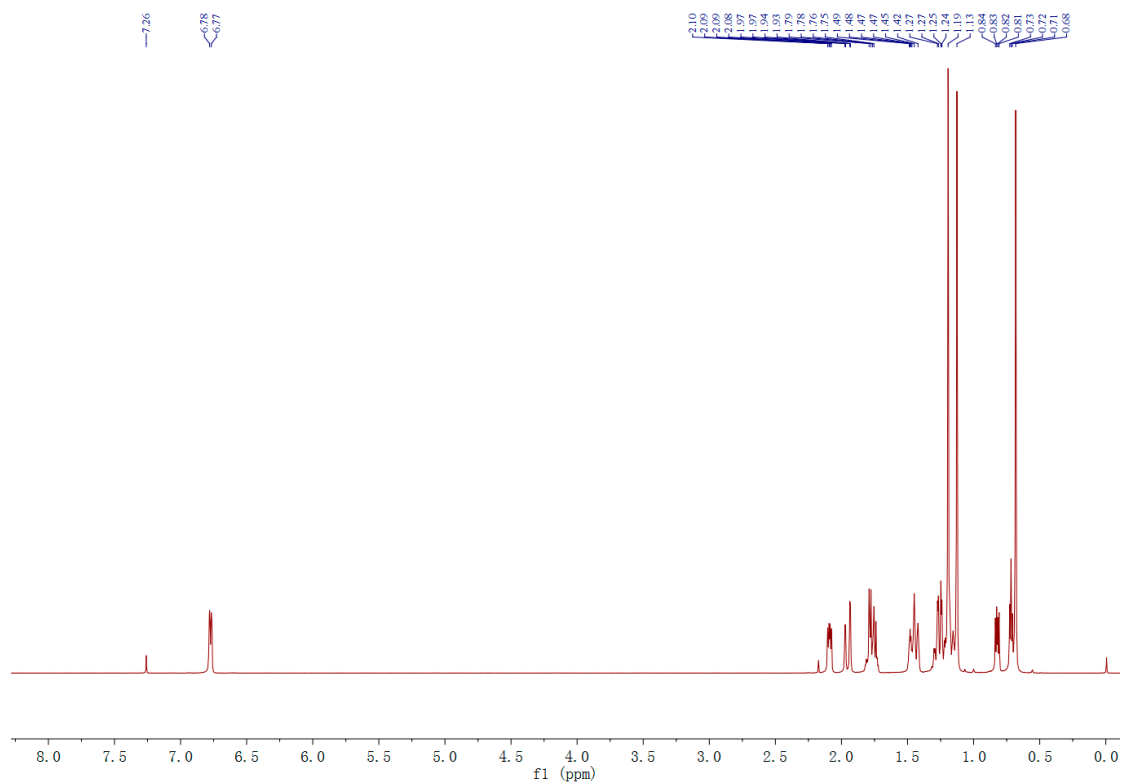

Figure S39.  $^1\text{H}$ -NMR spectrum of hinokiic acid (**16**) in  $\text{CDCl}_3$ .

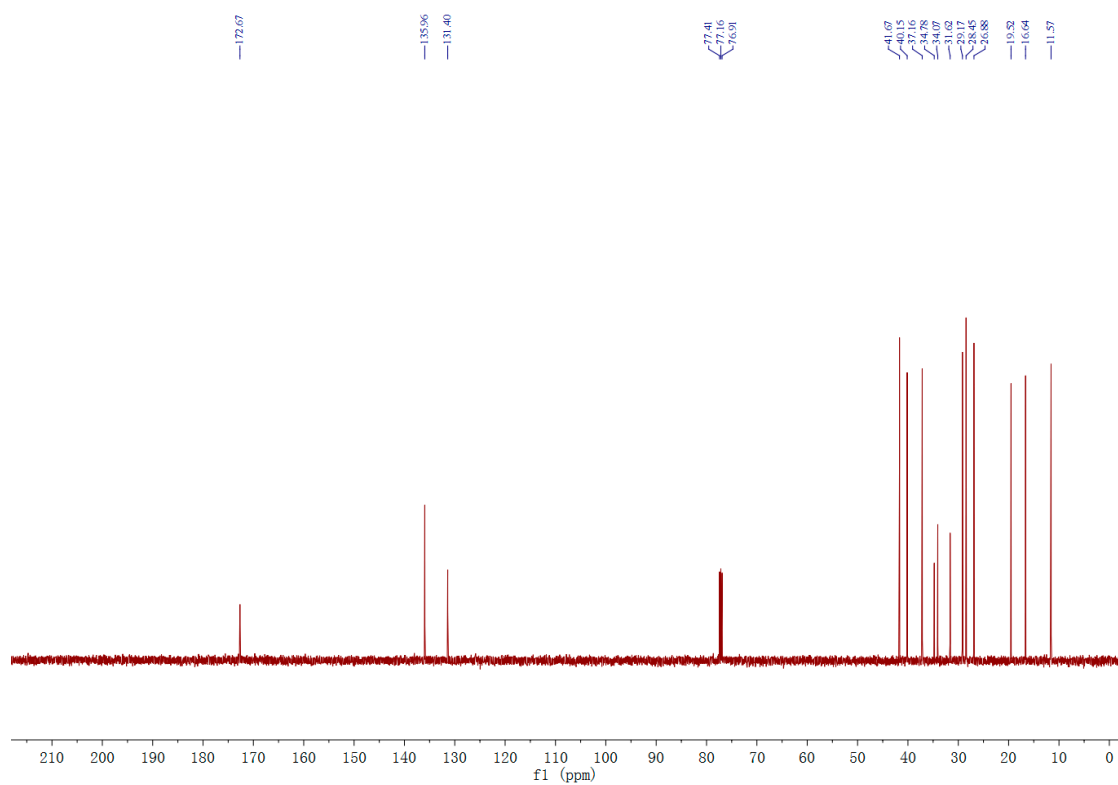

Figure S40.  $^{13}\text{C}$ -NMR spectrum of hinokiic acid (**16**) in  $\text{CDCl}_3$ .

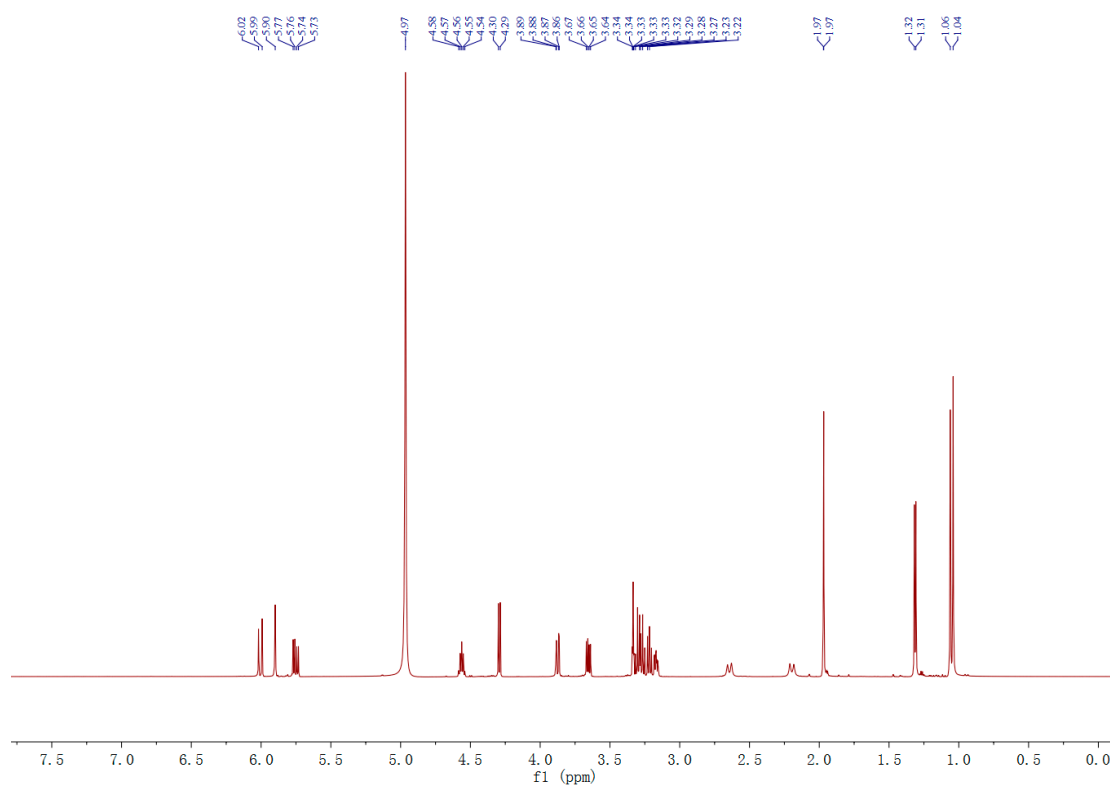

Figure S41.  $^1\text{H}$ -NMR spectrum of corchoionoside C (**17**) in  $\text{CD}_3\text{OD}$ .

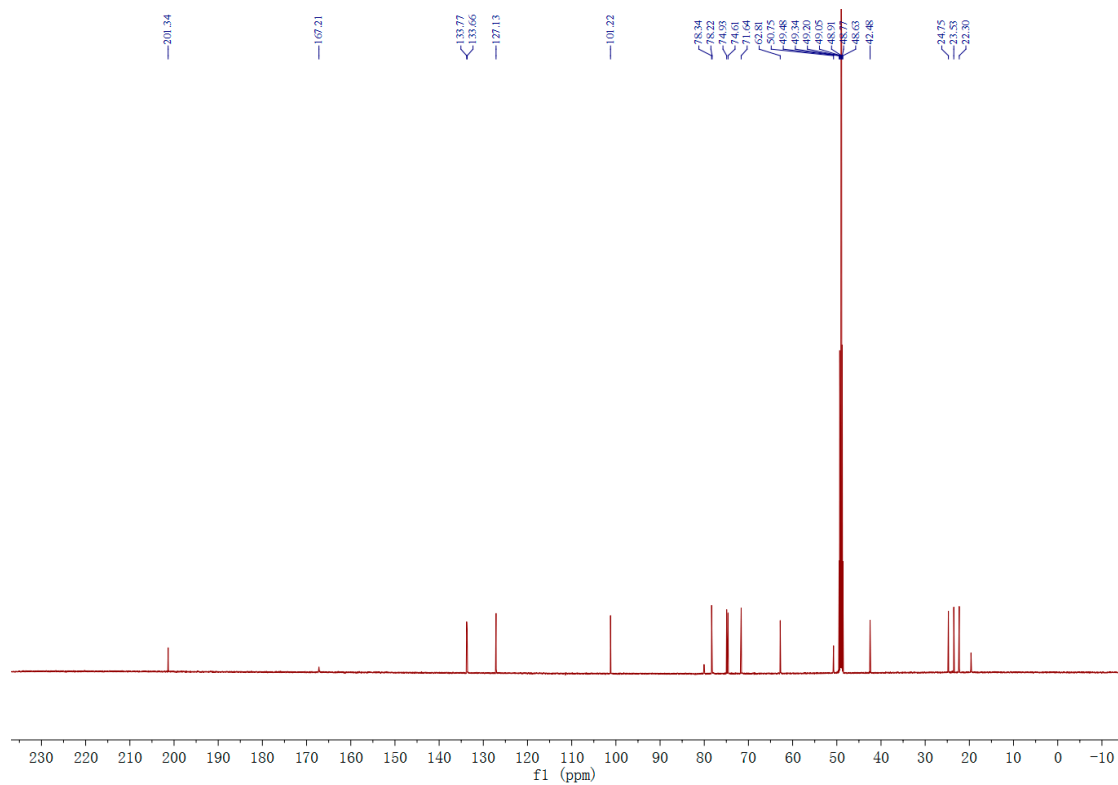

Figure S42.  $^{13}\text{C}$ -NMR spectrum of corchoionoside C (**17**) in  $\text{CD}_3\text{OD}$ .

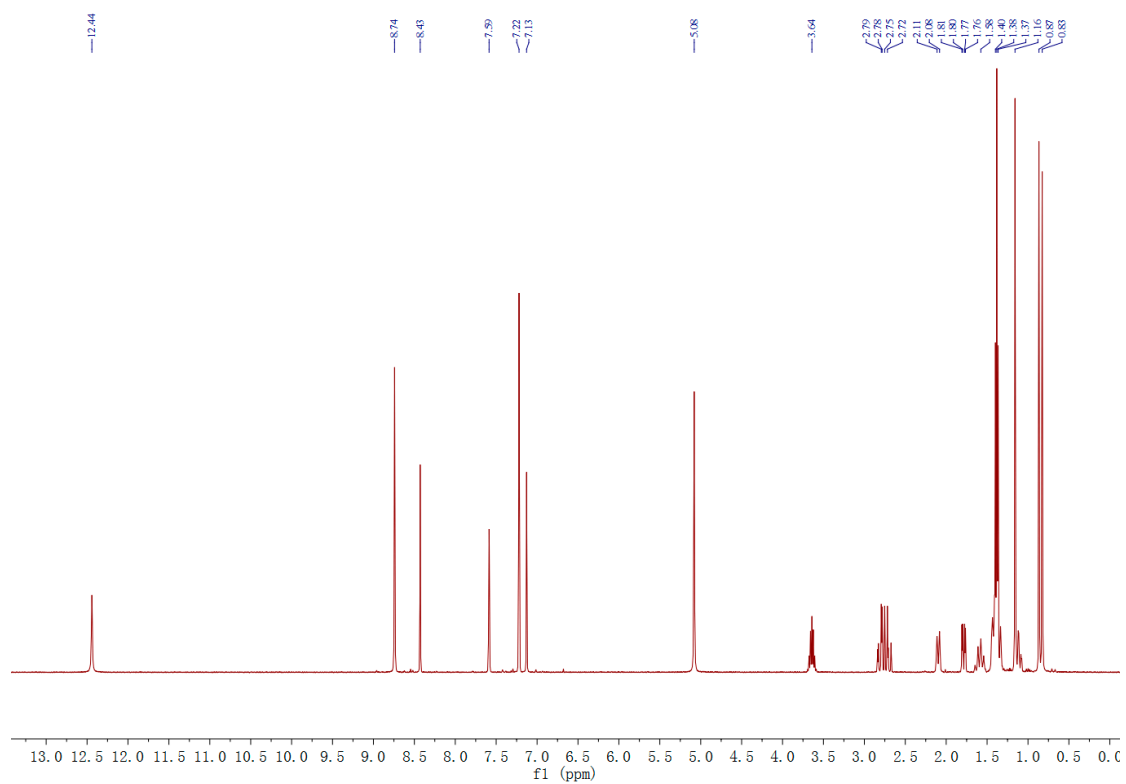

Figure S43. <sup>1</sup>H-NMR spectrum of hinokiol (18) in pyridine-*d*<sub>6</sub>.

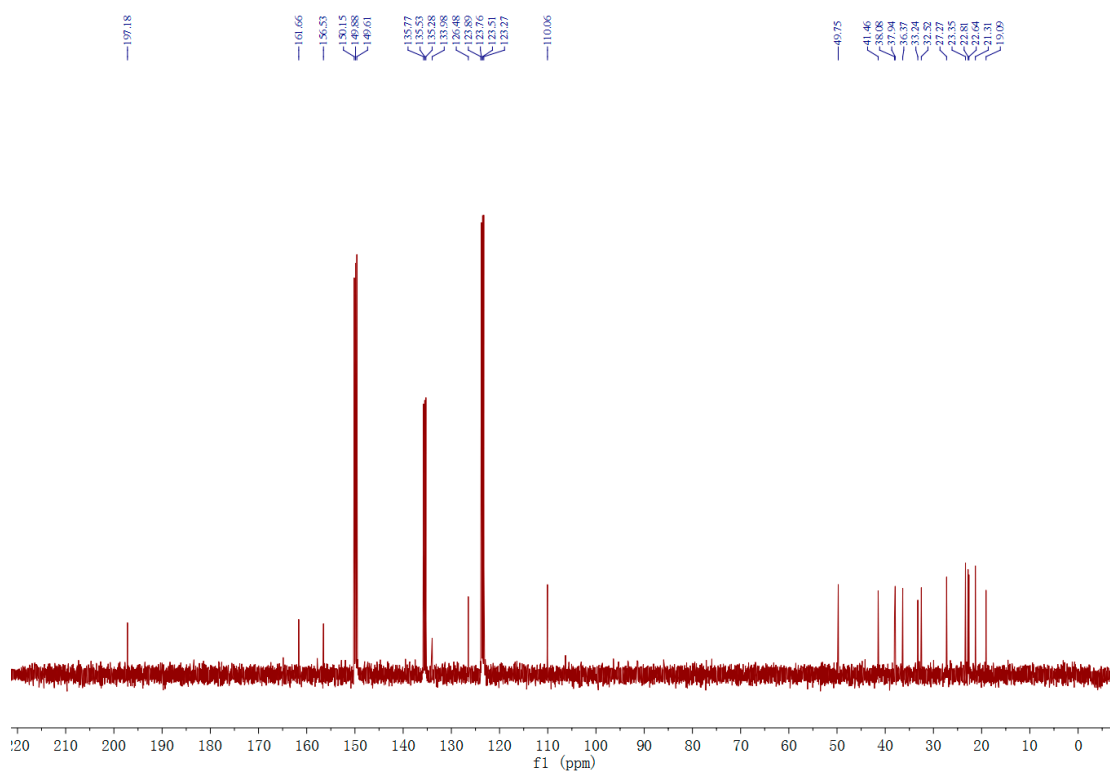

Figure S44. <sup>13</sup>C-NMR spectrum of hinokiol (18) in pyridine-*d*<sub>6</sub>.

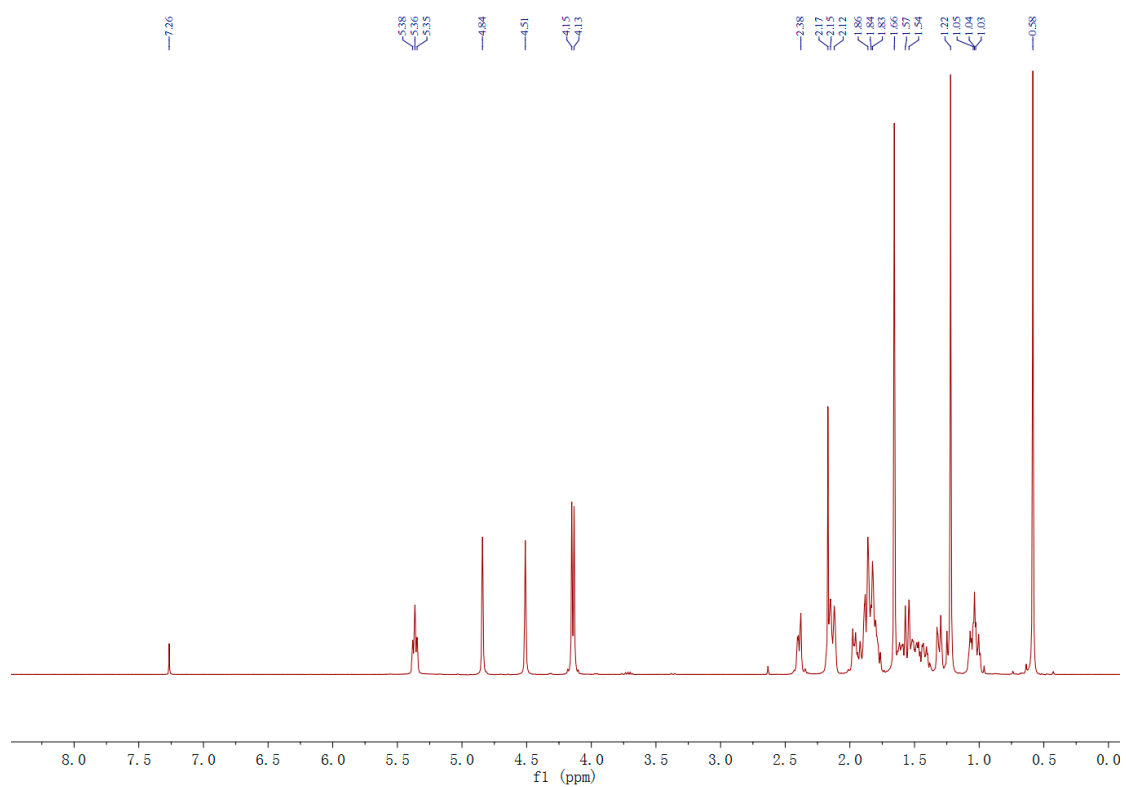

Figure S45.  $^1\text{H}$ -NMR spectrum of isocupressic acid (19) in  $\text{CDCl}_3$ .

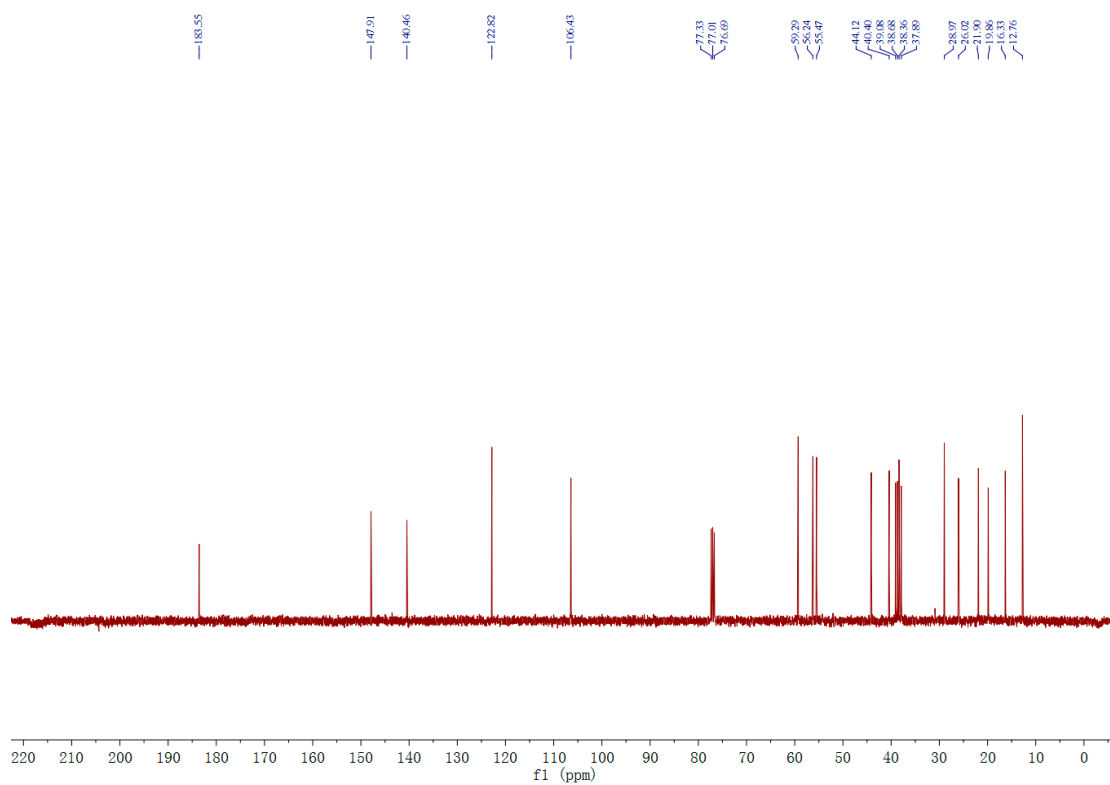

Figure S46.  $^{13}\text{C}$ -NMR spectrum of isocupressic acid (19) in  $\text{CDCl}_3$ .



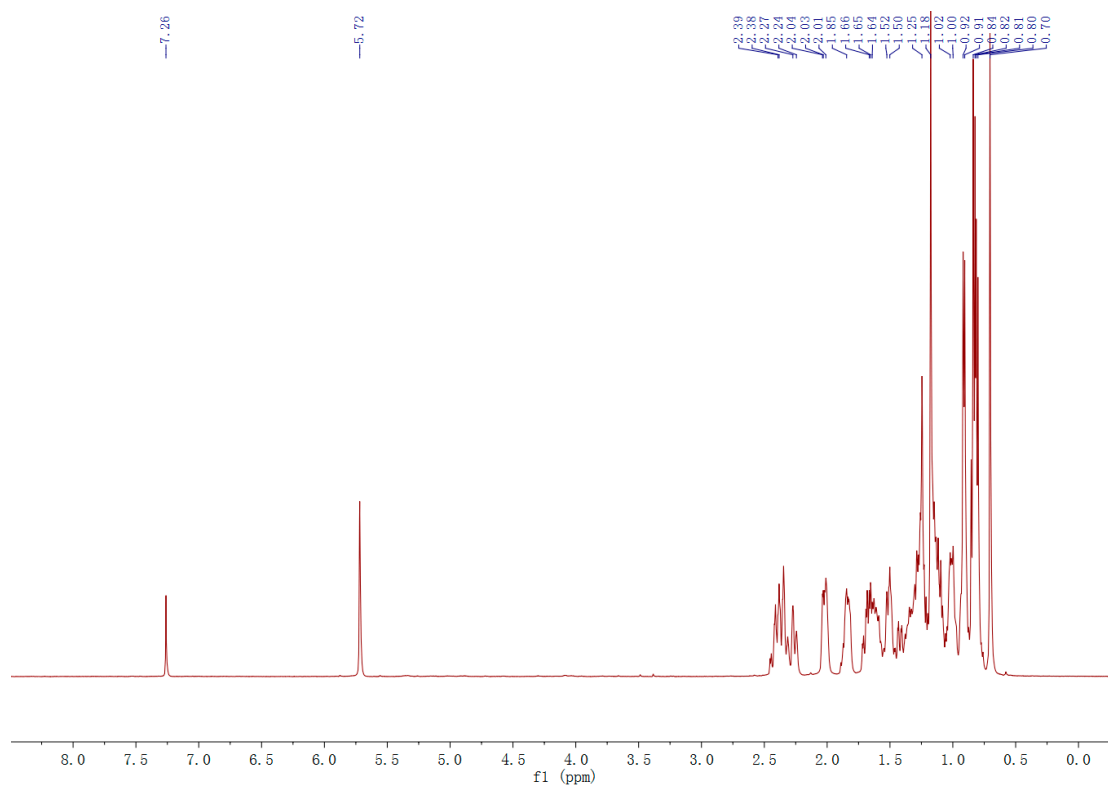Figure S47.  $^1\text{H}$ -NMR spectrum of sitostenone (20) in  $\text{CDCl}_3$ .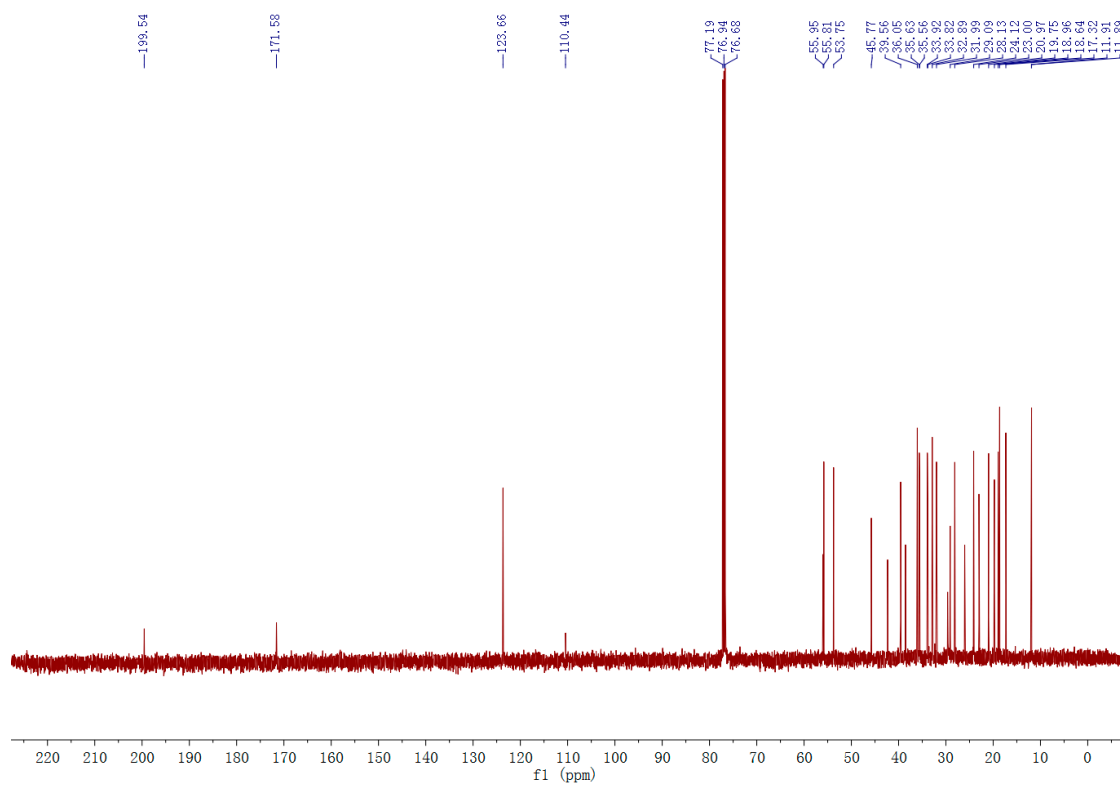Figure S48.  $^{13}\text{C}$ -NMR spectrum of sitostenone (20) in  $\text{CDCl}_3$ .
